1

2

3

4 Putative pore-forming subunits of the mechano-electrical transduction channel,  
5 Tmc1/2b, require Tmie to localize to the site of mechanotransduction in zebrafish  
6 sensory hair cells

7

8

9 Itallia V. Pacentine and Teresa Nicolson\*

10 Oregon Hearing Research Center and Vollum Institute, Oregon Health & Science University,

11 Portland, Oregon, United States of America

12

13

14 \*Corresponding author

15 E-mail: nicolson@ohsu.edu

## 16 **Abstract**

17 Mutations in transmembrane inner ear (*TMIE*) cause deafness in humans; previous  
18 studies suggest involvement in the mechano-electrical transduction (MET) complex in sensory  
19 hair cells, but *TMIE*'s precise role is unclear. In *tmie* zebrafish mutants, we observed that GFP-  
20 tagged *Tmc1* and *Tmc2b*, which are putative subunits of the MET channel, fail to target to the  
21 hair bundle. In contrast, overexpression of *Tmie* strongly enhances the targeting of *Tmc2b*-GFP  
22 to stereocilia. To identify the motifs of *Tmie* underlying the regulation of the *Tmcs*, we  
23 systematically deleted or replaced peptide segments. We then assessed localization and  
24 functional rescue of each mutated/chimeric form of *Tmie* in *tmie* mutants. We determined that  
25 the first putative helix was dispensable and identified a novel critical region of *Tmie*, the  
26 extracellular region and transmembrane domain, which mediates both mechanosensitivity and  
27 *Tmc2b*-GFP expression in bundles. Collectively, our results suggest that *Tmie*'s role in sensory  
28 hair cells is to target and stabilize *Tmc* subunits to the site of MET.

29

## 30 **Author summary**

31 Hair cells mediate hearing and balance through the activity of a pore-forming channel in  
32 the cell membrane. The transmembrane inner ear (*TMIE*) protein is an essential component of  
33 the protein complex that gates this so-called mechanotransduction channel. While it is known  
34 that loss of *TMIE* results in deafness, the function of *TMIE* within the complex is unclear. Using  
35 zebrafish as a deafness model, Pacentine and Nicolson demonstrate that *Tmie* is required for the  
36 localization of other essential complex members, the transmembrane channel-like (*Tmc*)  
37 proteins, *Tmc1/2b*. They then evaluate twelve unique versions of *Tmie*, each containing

38 mutations to different domains of Tmie. This analysis reveals that some mutations in Tmie cause  
39 dysfunctional gating of the channel as demonstrated through reduced hair cell activity, and that  
40 these same dysfunctional versions also display reduced Tmc expression at the normal site of the  
41 channel. These findings link hair cell activity with the levels of Tmc in the bundle, reinforcing  
42 the currently-debated notion that the Tmcs are the pore-forming subunits of the  
43 mechanotransduction channel. The authors conclude that Tmie, through distinct regions, is  
44 involved in both trafficking and stabilizing the Tmcs at the site of mechanotransduction.

45

## 46 **Introduction**

47         The auditory and vestibular systems detect mechanical stimuli such as sound, gravity, and  
48 acceleration. These two systems share a sensory cell type called hair cells. The somas of hair  
49 cells are embedded in the epithelium and extend villi-like processes from their apex into the  
50 surrounding fluid. The shorter of these, the stereocilia, are arranged in a staircase-like pattern  
51 adjacent to a single primary cilium known as a kinocilium. Neighboring cilia are connected by  
52 protein linkages. Deflection of the kinocilium along the excitatory axis tugs the interconnected  
53 stereocilia, which move as a single unit called the hair bundle [1]. When tension is placed on the  
54 upper-most linkages known as tip links, the force is thought to open mechanosensitive channels  
55 at the distal end of the shorter stereocilia [2, 3]. These channels pass current, depolarizing the  
56 cell and permitting electrical output to the brain via the eighth cranial nerve. The conversion of a  
57 mechanical stimulus into an electrical signal is known as mechano-electrical transduction (MET)  
58 [4]. The proteins located at the site of MET and involved in gating the MET channel are

59 collectively known as the MET complex. How the components of the MET complex, including  
60 the channel itself, are localized to and maintained at the stereocilia tips is not well understood.

61 To characterize the molecular underpinnings of MET and the underlying cause of  
62 pathology in human patients, it is essential to examine the individual components of the  
63 transduction complex in a comprehensive fashion. Thus far, only a few proteins have been  
64 designated as members of the MET complex. The identity of the channel itself remains  
65 contentious, but currently the best candidates for the pore-forming subunits are the  
66 Transmembrane Channel-like (TMC) proteins TMC1 and TMC2. Mutations in *TMC1* cause  
67 human deafness [5], and double knock-outs of mouse *Tmc1/2* result in the loss of MET currents  
68 [6-8]. In zebrafish, overexpression of a fragment of *Tmc2a* generates a dominant negative effect  
69 on hair-cell mechanosensitivity [9] and *Tmc2a* and *Tmc2b* are required for MET in hair cells of  
70 the lateral line organ [10]. The TMCs localize to the tips of stereocilia, the site of MET, in mice  
71 and zebrafish [3, 6, 8, 10-12]. A point mutation in mouse *Tmc1* results in altered channel  
72 properties, suggesting direct changes to the pore [7, 13]. Likewise, in TMC2 knockout mice,  
73 channel permeation properties are altered [14]. Regardless of whether the TMCs are the pore-  
74 forming or accessory subunits of the channel, they are essential for MET.

75 Another key component of the complex is Protocadherin-15 (PCDH15), which comprises  
76 the lower end of the tip link [15, 16] and interacts with the TMCs [8, 9]. A fourth membrane  
77 protein, Lipoma HMGIC fusion partner-like 5 (LHFPL5, formerly called TMHS), interacts with  
78 PCDH15 and is critical for localizing PCDH15 to the site of MET [17, 18]. LHFPL5 is also  
79 required to properly localize TMC1 in mouse cochlear hair cells [8]. However, loss of LHFPL5  
80 in cochlear hair cells does not completely abolish MET currents, and currents can be rescued by  
81 overexpression of PCDH15 [18]. This evidence suggests that LHFPL5 is not essential but rather

82 acts as an accessory protein. Another TMC1/2 interacting partner is Calcium and integrin  
83 binding protein 2 (CIB2), which is a cytosolic protein that is localized in stereocilia and required  
84 for MET in cochlear hair cells [19].

85 A sixth essential member of the MET complex is the transmembrane inner ear (TMIE)  
86 protein. Loss of TMIE results in deafness in all vertebrate organisms studied [20-25]. A recent  
87 study demonstrated that TMIE is required for active MET channels in cochlear hair cells of mice  
88 [26]. These authors showed that despite normal morphology of the inner ear, hair cells lacking  
89 TMIE fail to label with aminoglycosides or FM 1-43, both of which are known to permeate the  
90 MET channel [27, 28]. TMIE was first localized to the stereocilia of hair cells [29, 30], and then  
91 to the stereocilia tips where MET occurs [25]. Zhao et al. further demonstrated that loss of TMIE  
92 ablates MET currents, that TMIE interacts with both LHFPL5 and the CD2 isoform of PCDH15,  
93 and that interfering with the TMIE-CD2 interaction alters MET. They proposed that TMIE could  
94 be a force-coupler between the tip link and channel. However, the CD2 isoform of PCDH15 is  
95 only essential in cochlear hair cells and not vestibular hair cells [31]. Zebrafish do not possess  
96 the CD2 isoform [9, 32], and yet they still require *Tmie* for hair-cell function [21]. These  
97 findings raised the tantalizing possibility that *Tmie* might have an additional role in MET that is  
98 independent from the tip links. Here, we present an alternative role for *Tmie* in hair cell function.

99 We first confirmed that mechanosensitivity is absent in a zebrafish mutant of *tmie*,  
100 *ru1000*, and demonstrated that this defect is rescued by transgenic *Tmie*-GFP. The localization  
101 of *Tmie*-GFP is maintained in the absence of other transduction components, suggesting that  
102 *Tmie* traffics independently to hair bundles. Unexpectedly, GFP-tagged *Tmcs* fail to localize to  
103 the hair bundle in *tmie* mutants, and overexpression of *Tmie* leads to a corresponding increase in  
104 bundle expression of *Tmc2b*-GFP. To determine which regions of *Tmie* are involved in

105 regulating the Tmcs, we performed a domain analysis of *tmie* by expressing mutated or chimeric  
106 transgenes of *tmie* in *tmie<sup>ru1000</sup>*, and made three key discoveries: (i) *Tmie* can function without  
107 its putative first transmembrane domain, (ii) the remaining helix (2TM) and adjacent regions are  
108 responsible for *Tmie*'s function in hair cells, and (iii) dysfunctional *tmie* constructs have reduced  
109 efficacy in localizing the Tmcs, supporting the conclusion that impaired MET is due to reduction  
110 of Tmc protein. Our evidence suggests that *Tmie*'s role in the MET complex is to promote  
111 localization of Tmc1/2 to the site of MET in zebrafish sensory hair cells.

112

## 113 **Results**

### 114 **Gross morphology is normal in *tmie<sup>ru1000</sup>* mutant zebrafish**

115 The literature on TMIE's role in sensory hair cells is somewhat contradictory. Earlier  
116 studies proposed a developmental role for TMIE [20-22], while later studies evidenced a role in  
117 MET [25, 26]. To begin our analysis and attempt to clarify the issue in zebrafish, we examined  
118 live *tmie<sup>ru1000</sup>* larvae at 5-7 dpf using confocal microscopy. The *ru1000* allele harbors a nonsense  
119 mutation leading to an N-terminal truncation, L25X [21]. We observed that mature hair cells of  
120 *tmie<sup>ru1000</sup>* larvae were grossly normal compared to wild type siblings in both the inner ear cristae  
121 and the lateral line organ, an organ specific to fish and amphibians (Fig 1A). We noted a slight  
122 thinning of the mutant hair bundles, as revealed using a transgene Actin-GFP. Thin bundles have  
123 been observed in other zebrafish MET mutants, such as those carrying mutations in *ap1b1* and  
124 *tomt*. Both genes have been previously implicated in protein trafficking in hair cells, with *tomt*  
125 having a specific role in targeting Tmc1/2 proteins to the hair bundle [11, 33].

126

## 127 **Tmie-deficient zebrafish are deaf due to a defect in hair cell mechanosensitivity**

128       Next, we used an assay for the auditory evoked behavior response (AEBR) to quantify  
129 hearing loss in *tmie<sup>ru1000</sup>* mutants. We exposed 6 dpf larvae to a loud pure tone stimulus (157 dB,  
130 1000 Hz, 100 ms) once every 15 seconds for three minutes and recorded their startle responses  
131 (sample traces in Fig 1B). Larvae deficient in *tmie* appear to be profoundly deaf, with little to no  
132 response as compared to wild type siblings (Fig 1B and 1C). We then determined basal  
133 (unevoked) hair cell activity of *tmie<sup>ru1000</sup>* larvae using FM 1-43 or FM 4-64. Both are vital dyes  
134 that permeate open channels, making them useful as a proxy measure of the presence of active  
135 MET channels in hair cells [27, 28, 34]. A 30-second bath application of FM dye readily labels  
136 hair cells of the lateral line organ, which are arranged in superficial clusters called neuromasts.  
137 We briefly exposed wild type and *tmie<sup>ru1000</sup>* larvae to FM dye and then imaged the neuromasts  
138 (Fig 1D). Consistent with previous findings [21, 22, 26], *tmie<sup>ru1000</sup>* neuromasts have a severe  
139 reduction in FM labeling, suggesting that these hair cells have a MET defect (Fig 1F). To  
140 characterize mechanically evoked responses of hair cells, we recorded extracellular potentials, or  
141 microphonics (Fig 1H). Using a piezo actuator, we applied a 200 Hz sine wave stimulus to 3 dpf  
142 larvae while simultaneously recording voltage responses from hair cells of the inner ear. In  
143 agreement with results from our FM dye assay and with microphonic recordings previously  
144 reported [21], microphonics are absent in *tmie<sup>ru1000</sup>* larvae (Fig 1H, gray trace).

145

## 146 **Transgenic *tmie-GFP* rescues the functional defect in *tmie<sup>ru1000</sup>* mutants**

147       To rescue mechanosensitivity in *tmie<sup>ru1000</sup>* larvae, we generated a construct of *tmie* tagged  
148 with GFP on its C-terminus, then expressed this transgene using a hair cell-specific promoter,  
149 *myosin 6b* (*myo6b*). Stably expressed Tmie-GFP rescued the FM labeling in *tmie<sup>ru1000</sup>* hair cells

150 (Fig 1E and 1F). Tmie-GFP also restores microphonic potentials to wild-type levels (Fig 1H,  
151 orange trace). In a stable line with a single transgene insertion, we observed that Tmie-GFP  
152 expression varies among hair cells, even within the same patch of neuroepithelium (lateral crista,  
153 S1A Fig). Immature hair cells, which can be identified by their shorter stereocilia and kinocilia  
154 (S1A Fig, bracket and arrow, respectively), consistently show a bright and diffuse pattern of  
155 labeling. This high expression level in immature bundles is characteristic of transgenes expressed  
156 using the *myo6b* promoter, which drives expression more strongly in young hair cells [17, 34]. In  
157 mature hair cells, expression patterns of Tmie-GFP are variable. At high expression levels, Tmie-  
158 GFP is enriched in the bundle in a broader pattern (S1B Fig). At reduced levels, the GFP signal  
159 is concentrated at the beveled edge of the hair bundle (S1C Fig). At very low levels, we can  
160 observe puncta along the stereocilia staircase, consistent with localization at stereocilia tips (S1D  
161 Fig). We suspect that the diffuse “bundle fill” pattern is due to overexpression, and that lower  
162 levels of Tmie-GFP recapitulate the endogenous localization at the site of MET, as previously  
163 observed in mice [25].

164

### 165 **Tmie-GFP is capable of trafficking without other members of the MET complex**

166 Having confirmed that our exogenously expressed Tmie-GFP is functional, we used this  
167 transgene to probe Tmie’s role in the MET complex. First, we characterized Tmie’s interactions  
168 with other MET proteins *in vivo* by expressing transgenic Tmie-GFP in mutant *pcdh15a*, *lhfp15a*,  
169 and *tomt* larvae (Fig 2). Because a triple knock-out of zebrafish *tmc* has not been reported, we  
170 used *tomt* mutants as a proxy for *tmc*-deficient fish based on recent studies of defective bundle  
171 localization of the Tmcs in *tomt*-deficient fish and mice [11, 35]. As in wild type bundles (Fig  
172 2A), Tmie-GFP is detectable in the stereocilia in each of these MET mutants (Fig 2B and 2D),



173 even if hair bundles are splayed (Fig 2B and 2C, arrowheads). This result suggests that Tmie  
174 does not depend on interactions with other MET components for entry into the hair bundle.

175

### 176 **Tmc1-GFP and Tmc2b-GFP fail to localize to stereocilia without Tmie**

177 To determine if the loss of Tmie affects the other components of the  
178 mechanotransduction complex, we expressed GFP-tagged mechanotransduction proteins  
179 (Pcdh15aCD3, Lhfp15a, Tmc1, and Tmc2b) in *tmie<sup>ru1000</sup>* mutants. Both Pcdh15aCD3-GFP (Fig  
180 3A) and GFP-Lhfp15a (Fig 3B) showed GFP fluorescence in hair bundles with a punctate  
181 distribution, similar to the pattern seen in wild type bundles. This result is consistent with the  
182 intact morphology of *tmie<sup>ru1000</sup>* hair bundles. However, when we imaged Tmc1-GFP (Fig 3C) and  
183 Tmc2b-GFP (Fig 3E), GFP fluorescence was severely reduced in the hair bundles of *tmie<sup>ru1000</sup>*  
184 mutants. In mature *tmie<sup>ru1000</sup>* hair cells, we often saw a signal within the apical soma near the  
185 cuticular plate, indicative of a trafficking defect (Fig 3E, arrows; position of cuticular plate  
186 denoted in Fig 1G). We quantified Tmc expression in the hair bundle region and observed a  
187 striking and consistent reduction in *tmie* mutants (Fig 3D and 3F). Previously, we reported that  
188 localization of transgenic Tmc-GFP is unaffected in *pcdh15a* mutants [11], demonstrating that  
189 mislocalization of Tmc1/2 is not a hallmark of all MET mutants.

190

### 191 **Overexpression of Tmie increases bundle localization of Tmc2b-GFP**

192 We hypothesized that if the loss of Tmie reduces Tmc localization in the hair bundle,  
193 then overexpression of Tmie may have the opposite effect. To test the consequence of  
194 overexpression of Tmie on Tmc localization, we created a second construct of *tmie* coupled with  
195 *p2A-NLS(mCherry)* driven by the *myo6b* promoter. The p2A linker is a self-cleaving peptide,

196 which leads to translation of equimolar amounts of Tmie and NLS(mCherry). Hence, mCherry  
197 expression in the nucleus denotes Tmie expression in the cell (Fig 3G, lower panels). We  
198 generated a stable *tmie<sup>ru1000</sup>* fish line carrying the *tmie-p2A-NLS(mCherry)* transgene and then  
199 crossed it to the *Tg(myo6b:tmc2b-GFP); tmie<sup>ru1000</sup>* line. We observed that overexpression of  
200 Tmie led to a 2.5-fold increase in expression of Tmc2b-GFP in the bundles of hair cells when  
201 compared to wild type siblings that carried only the *tmc2b-GFP* transgene (Fig 3G and 3H).  
202 Combined with the finding that Tmc expression is lost in hair bundles lacking Tmie, our data  
203 suggest that Tmie positively regulates Tmc localization to the hair bundle.

204

### 205 **Transgenes can effectively determine protein functionality**

206 To gain a better understanding of Tmie's role in regulating the Tmcs, we characterized a  
207 new allele of *tmie*, *t26171*, which was isolated in a forward genetics screen for balance and  
208 hearing defects in zebrafish larvae. Sequencing revealed that *tmie<sup>t26171</sup>* fish carry an A→G  
209 mutation in the splice acceptor of the final exon of *tmie*, which leads to use of a nearby cryptic  
210 splice acceptor (S2A Fig, *DNA*, *cDNA*). Use of the cryptic acceptor causes a frameshift that  
211 terminates the protein at amino acid 139 (A140X), thus removing a significant portion of the C-  
212 terminal tail (S2A Fig, *Protein*). Homozygous mutant larvae exhibit severe auditory and  
213 vestibular deficits, being insensitive to acoustic stimuli and unable to maintain balance (S2A Fig,  
214 *Balance*). FM 4-64 labeling of *tmie<sup>t26171</sup>* mutant hair cells suggests that the effect of the mutation  
215 is similar to the *ru1000* mutation (S2B and S2D Figs). This finding implicates the C-terminal  
216 tail, a previously uncharacterized region, in Tmie's role in MET. However, when we  
217 overexpressed a near-mimic of the predicted protein product of *tmie<sup>t26171</sup>* (1-138-GFP) using the  
218 *myo6b* promoter, we observed full rescue of FM labeling defects in *tmie<sup>ru1000</sup>* (S2C and S2D

219 Figs), as well as behavioral rescue of balance and acoustic sensitivity (n=19). These results  
220 revealed that when expressed at higher levels, loss of residues 139-231 does not have a  
221 significant impact on Tmie's ability to function.

222 This paradoxical finding highlighted an important advantage of the use of transgenes over  
223 traditional mutants. There are myriad reasons why a genomic mutation may lead to dysfunction,  
224 including reduced transcription or translation, protein misfolding and degradation, or  
225 mistrafficking. Exogenous expression may overcome these deficiencies by producing proteins at  
226 higher levels. Moreover, the use of transgenes enabled us to carry out a more comprehensive  
227 structure/function study of Tmie. To test a collection of deletions and chimeras of Tmie, we  
228 therefore used the *myo6b* promoter to drive exogenous expression of the constructs in hair cells  
229 of the *tmie<sup>ru1000</sup>* mutant.

230 We systematically deleted or replaced regions of *tmie* to generate 12 unique *tmie*  
231 constructs (Fig 4A). Earlier studies in zebrafish and mice proposed that Tmie undergoes  
232 cleavage, resulting in a single-pass mature protein [21, 36]. To test this hypothesis, we generated  
233 the SP44-231 construct of Tmie, which replaced the N-terminus with a known signal peptide  
234 (SP) from a zebrafish Glutamate receptor protein (*Gria2a*). The purpose of the unrelated signal  
235 peptide was to preserve the predicted membrane topology of Tmie. We also made a similar  
236 construct that begins at amino acid 63, where the sequence of Tmie becomes highly conserved  
237 (*SP63-231*). Three of the constructs contained internal deletions (*Δ63-73*; *Δ97-113*; *Δ114-138*).  
238 In three more constructs, we replaced part of or the entire second transmembrane helix (2TM)  
239 with a dissimilar helix from the CD8 glycoprotein (*CD8*; *CD8-2TM*; *2TM-CD8*). We included  
240 our mimic of the zebrafish *tmie<sup>t26171</sup>* mutant, which truncates the cytoplasmic C-terminus (*I-*  
241 *I38*). To further truncate the C-terminus, we made a construct that mimics the mouse *sr<sup>J</sup>* mutant

242 (*I-113*). In mice, this truncation recapitulates the full-deletion phenotype [20]. Finally, we  
243 included an alternate isoform of *Tmie* that uses a different final exon, changing the C-terminal  
244 sequence (*Tmie-short*). This isoform is found only in zebrafish [21] and its function has not been  
245 explored.

246

### 247 **Subcellular localization of mutated or chimeric *Tmie* reveals domains required for self-** 248 **localization to the bundle**

249 We first determined the subcellular localization of each *Tmie* fusion protein. Plasmid  
250 DNA was co-injected into *tmie<sup>ru1000</sup>* eggs with transposase to generate mosaic expression of the  
251 constructs in a subset of hair cells. At 4-6 days post injection, we imaged individual hair cells  
252 expressing each transgene (Fig 4B). To quantify the enrichment in the bundle versus soma, we  
253 measured the integrated density of GFP fluorescence in a small central area of mature bundles  
254 (Fig 4C, black oval) and separately in the plasma membrane or soma-enriched compartments  
255 (Fig 4C, magenta oval). Correcting for area, we then divided the bundle values by the total  
256 values (bundle/bundle + soma) and expressed this as a ratio (Fig 4D). Values closer to 1 are  
257 bundle enriched, while values closer to 0 are soma-enriched. We excluded the *CD8-GFP*  
258 construct from further analyses because it was detected only in immature bundles (Fig 4B, *CD8*).

259 Localization fell into three broad categories: bundle-enriched, soma-enriched, and  
260 equally distributed. Most of the fusion proteins were bundle-enriched, similar to full-length  
261 *Tmie*-GFP expression (Fig 4B and 4D). Three constructs were trafficked to the bundle but also  
262 expressed in the soma (*SP63-231*, *CD8-2TM*, *I-138*). This result suggests that the deleted  
263 regions in these constructs have some role in designating *Tmie* as a bundle-localized protein.  
264 Also of note, the full replacement of the 2TM helix (*CD8*) was unable to maintain stable

265 expression in mature bundles. Half-TM replacements (*CD8-2TM*, *2TM-CD8*) revealed that loss  
266 of the first half of the helix affects trafficking, whereas alteration of the second half had no  
267 effect. Only two constructs were soma-enriched (*Tmie-short* and *I-113*), suggesting an inability  
268 to traffic to the bundle. These two transgenes were thus excluded from further analyses.

269

## 270 **FM labeling identifies functional regions in the second transmembrane domain and** 271 **adjacent residues of Tmie**

272 To identify regions of Tmie involved in mechanosensitivity of hair cells, we measured  
273 the functionality of the nine *tmie* constructs that showed hair bundle expression. As in Fig 1F, we  
274 generated stable lines of each transgenic construct and quantified fluorescence in neuromasts  
275 after exposure to FM 4-64 (Fig 5).

276 Of nine constructs examined, four showed wild type levels of FM fluorescence in  
277 *tmie<sup>ru1000</sup>* neuromasts (*Tmie*, *SP44-231*,  $\Delta$ *114-138*, and *I-138*; Fig 5A and 5B). Two constructs  
278 ( $\Delta$ *97-113* and  $\Delta$ *63-73*) did not rescue above mutant levels of FM 4-64, although  $\Delta$ *63-73* showed  
279 a non-significant increase in FM fluorescence. While residues 63-73 have not been characterized,  
280 the  $\Delta$ *97-113* result is consistent with the findings of previous publications in humans and mice,  
281 showing that mutations in this region impair hearing and hair cell function [23, 25]. Three  
282 constructs were capable of partial rescue (*SP63-231*, *CD8-2TM*, and *2TM-CD8*). Each one of the  
283 five dysfunctional constructs altered part of a contiguous region of Tmie: the 2TM and  
284 surrounding domains. These results highlight this region of Tmie as vital for function. To  
285 determine whether any of the constructs also have a dominant effect on hair-cell function, we  
286 compared FM label in wild type larvae with or without the individual transgenic *tmie* construct  
287 (Fig 5D). *SP63-231* and  $\Delta$ *63-73*, which had impaired rescue in *tmie<sup>ru1000</sup>*, showed reduced FM

288 label in transgenic wild type cells (Fig 5C and 5D). Interestingly, these two dominant negative  
289 constructs alter the extracellular region of Tmie.

290

291 **Recordings of mechanically evoked responses confirm that the second transmembrane**  
292 **domain and adjacent regions are required for hair cell function**

293 Bath applied FM dye demonstrates the presence of permeable MET channels, but does  
294 not reveal any changes in mechanically evoked responses in hair cells. Therefore, we also  
295 recorded microphonics of mutant larvae expressing individual transgenes. For our recordings, we  
296 inserted a recording pipette into the inner ear cavity of 3 dpf larvae and pressed a glass probe  
297 against the head (Fig 6A). Using a piezo actuator to drive the probe, we delivered a step stimulus  
298 at increasing driver voltages while recording traces in current clamp (Fig 6B). For each  
299 transgenic *tmie* line, we measured the amplitude of the response at the onset of stimulus (Fig 6C-  
300 D). We limited our analysis to the lines expressing constructs that failed to fully rescue FM  
301 labeling (Fig 6E-I). As positive controls, we used the full-length *tmie* line (Fig 65 C) and also  
302 included *SP44-231* (Fig 6D), encoding the cleavage product mimic. Both controls fully rescued  
303 the responses in *tmie<sup>ru1000</sup>* larvae. Consistent with a reduction in labeling with FM dye, we found  
304 that the microphonic responses were strongly or severely reduced in larvae expressing the *SP63-*  
305 *231*, *Δ63-73*, *CD8-2TM*, *2TM-CD8* and *Δ97-113* constructs in the *tmie<sup>ru1000</sup>* background (Fig 6E-  
306 I). We also saw the same dominant negative effect in wild type larvae expressing transgenic  
307 *SP63-231* or *Δ63-73*.

308

309 **Regions of *Tmie* that mediate hair-cell mechanosensitivity are also required for localizing**  
310 ***Tmc2b*-GFP**

311 After identifying functional regions of *Tmie*, we asked whether these regions are  
312 involved in regulating *Tmc* localization. Therefore we quantified hair bundle expression of  
313 transgenic *Tmc2b*-GFP in hair cells of *tmie<sup>ru1000</sup>* mutant larvae stably co-expressing individual  
314 transgenic *tmie* constructs (Fig 7B-H). As in Fig 3 G, we tagged our *tmie* constructs with p2A-  
315 NLS(mCherry) so that *Tmc2b*-GFP expression in the hair bundles could be imaged separately.  
316 We examined SP44-231 and the five *tmie* constructs that yielded impaired mechanosensitivity.

317 Three constructs showed full rescue of *Tmc2b*-GFP levels in the bundle. The SP44-231  
318 cleavage mimic produced highly variable levels, some in the wild type range, others increasing  
319 *Tmc2b*-GFP expression above wild type (Figs 7B and 7H), as seen in overexpression of full-  
320 length *Tmie* (Figs 3H and 7A, right panel). We suspect that the exogenous *Gria2a* signal peptide  
321 leads to variable processing of *Tmie* and thus contributes to this variability in *Tmc2b*-GFP  
322 fluorescence. *tmie<sup>ru1000</sup>* larvae expressing the SP63-231 construct gave rise to values of *Tmc2b*-  
323 GFP fluorescence within the wild type range (Fig 7C and 7H). When we recorded microphonics  
324 in these larvae, we found that co-overexpression of *Tmc2b*-GFP and SP63-231 resulted in better  
325 functional rescue of *tmie<sup>ru1000</sup>* (S3A Fig) than when SP63-231 was expressed alone (Fig 6E). We  
326 also determined that the microphonic potentials correlated with the levels of *Tmc2b*-GFP in the  
327 bundles (S3B Fig). Likewise, the 2TM-CD8 construct also generated values of *Tmc2b*-GFP  
328 fluorescence in the wild type range (Fig 7F and 7H). These larvae rescued microphonic  
329 potentials to wild type levels (S3C Fig), unlike when 2TM-CD8 was expressed alone (Fig 6E).  
330 Functional rescue again correlated with *Tmc2b*-GFP bundle levels (S3D Fig). These results  
331 indicate that functional rescue in the SP63-231 and 2TM-CD8 lines is *Tmc* dose-dependent.

332 Of the three constructs with little to no functional rescue, CD8-2TM (Fig 7E and 7H) and  
333  $\Delta 97-113$  (Fig 7G and 7H) had severely reduced levels of Tmc2b-GFP in hair bundles. In  
334 *tmie<sup>ru1000</sup>* expressing  $\Delta 63-73$ , there was severely reduced but still faintly detectable Tmc2b-GFP  
335 signal though, as with the functional rescue, this difference was not statistically significant (Fig  
336 7D and 7H). The bulk of this signal was observed in immature bundles (Fig 7D, arrows, and S4  
337 Fig), but there was some detectable Tmc2b-GFP signal in mature bundles (S4 Fig). Overall,  
338 these results suggest that the level of functional rescue by the *tmie* constructs is correlated to the  
339 amount of Tmc2b present in the hair bundle.

340

## 341 Discussion

342 *TMIE* was first identified as a deafness gene in mice and humans [20, 23]. The predicted  
343 gene product is a relatively small membrane protein containing a highly conserved amino acid  
344 sequence near the second hydrophobic helix. Previous studies established that TMIE is required  
345 for MET in hair cells [21, 25, 26] and is an integral member of the complex (Zhao et al., 2014).  
346 How TMIE contributes to the function of the MET complex was not clear. Our comprehensive  
347 structure-function analysis of *Tmie* revealed that the functional capacity of various *tmie* mutant  
348 constructs is determined by their efficacy in localizing Tmc2b-GFP to the bundle, as summarized  
349 in Fig 8A and modeled in Fig 8B. These findings unveil a hitherto unexpected role for *Tmie* in  
350 promoting the localization of the putative channel subunits Tmc1 and Tmc2b to the site of MET.  
351 These findings broaden our understanding of the assembly of the MET complex and point to a  
352 pivotal role of *Tmie* in this process.

353 A previous study of the *ru1000* mutant suggested that *Tmie*'s role in zebrafish hair cells  
354 was developmental, with mutant lateral line hair cells showing stunted kinocilia and the absence



355 of tip links [21]. In our hands we did not observe any gross morphological defects, and the  
356 localization pattern and the levels of Pcdh15a and Lhfp15a were unaffected in *tmie<sup>ru1000</sup>* larvae.  
357 This observation is consistent with intact hair bundle morphology; stereocilia that are splayed or  
358 disorganized are a dominant feature of hair cells missing their tip links, as seen in *pcdh15a* or  
359 *lhfp15a* mutants [17, 32]. In TMIE-deficient mice, hair cell morphology is grossly normal up to  
360 P7 [25, 26]. In agreement with a previous study in mice [25], our results indicate that *tmie<sup>ru1000</sup>*  
361 mutants are profoundly deaf due to ablation of MET in hair cells. We fully rescued this deficit in  
362 zebrafish *ru1000* mutants by exogenous expression of a GFP-tagged transgene of *tmie*.  
363 Exogenous expression gave rise to variable levels of Tmie-GFP in hair bundles, with lower  
364 levels revealing a punctate pattern expected for a member of the MET complex, and higher  
365 expression levels leading to expression throughout the stereocilia. Excess Tmie-GFP did not  
366 appear to cause adverse effects in hair cells, which is consistent with a previous study in the  
367 *circler* mouse mutant [37].

368

### 369 **Tmie can localize to hair bundles independently**

370 To determine the interdependence of trafficking of Tmie and the other MET components,  
371 we examined the localization of Tmie-GFP in mutants of essential MET genes: the tip-link  
372 protein *pcdh15a*; the accessory protein *lhfp15a*; and in *tomt* mutants (Fig 3). In both zebrafish and  
373 mice, the secretory pathway protein Tomt is required for proper localization of the Tmc1/2 [11,  
374 35]; the *tomt* mutant likely simulates the condition of a triple knockout of all three zebrafish *tmc*  
375 genes (*tmc1/2a/2b*). Despite the absence of Pcdh15a, Lhfp15a, and Tmcs, we found that Tmie-  
376 GFP still traffics to the bundles of hair cells. This finding suggests that Tmie can localize  
377 independently of the other proteins of the MET apparatus. This autonomy is an unusual feature

378 for membrane components of the MET complex. For example, PCDH15 largely requires  
379 LHFPL5 for trafficking to the stereocilia [17, 18, 38], and depends on Cadherin 23 to maintain  
380 its localization at the site of MET [17, 39]. LHFPL5 also requires PCDH15 to maintain  
381 localization at the stereocilia tips [18, 38]. Thus, Tmie appears to be the exception to the rule of  
382 co-dependent transport to the hair bundle.

383 Our results reveal that Tmie has distinct regions associated with self-localization and  
384 function (Fig 8). Three constructs showed impaired targeting of Tmie to the bundle, namely  
385 SP63-231, CD8-2TM, and the 1-138 construct, the last of which truncates the C-terminus.  
386 Further manipulation to the C-terminus, either by removing more amino acids (*I-113*) or by  
387 using an alternative final exon (*Tmie-short*), results in targeting of the protein to the plasma  
388 membrane instead of the bundle. However, removing just a smaller internal segment has no  
389 effect on bundle localization (Fig 4A and 4C, *Δ114-138*). We suspect that the abundance of  
390 charged residues in the C-terminus of Tmie (S2A Fig, *Protein*), as well as the regions altered in  
391 SP63-231 and CD8-2TM, contribute to recognition by bundle trafficking machinery.  
392 Mislocalization, however, did not necessarily correlate with functional rescue. Despite partial  
393 mislocalization to the plasma membrane, the 1-138 construct showed full functional rescue.  
394 Conversely, despite normal localization to the bundle, *Δ97-113* did not rescue function at all.  
395 These results demonstrate that Tmie's functional role is separate from its ability to target to the  
396 bundle.

397

### 398 **Tmie promotes the levels of Tmc1/2 in the hair bundle**

399 The regulatory role of Tmie with respect to the Tmcs is strongly supported by the  
400 strikingly different effects of loss of Tmie versus overexpression of Tmie. When Tmie is absent,

401 so are the Tmcs; when Tmie is overexpressed, the level of Tmc2b in the bundle is boosted as  
402 well (Fig 3C-H). These results disagree with a previous finding in mice showing that Myc-  
403 TMC2 is present in hair bundles of TMIE-deficient cochlear hair cells [25]. This discrepancy  
404 may be due to the use a cytomegalovirus promoter to drive high levels of expression of Myc-  
405 TMC2 in an *in vitro* explant of cochlear tissue. Localization of TMC1 in *Tmie*<sup>-/-</sup> mice, which is  
406 the predominant TMC protein in cochlear hair cells, was not reported. In addition, localization of  
407 the TMCs in vestibular hair cells was not characterized in *Tmie*<sup>-/-</sup> mice. Thus, further  
408 investigation is warranted to determine if the relationship between Tmie and the Tmcs uncovered  
409 by our experiments is a conserved feature or is potentially dependent on the type of hair cell, as  
410 MET components may vary among different cell types.

411 One important question is whether Tmie and the Tmcs can physically interact to form a  
412 complex that is transported to the hair bundle. A direct interaction of the mouse TMC1/2 and  
413 TMIE proteins was not detected in a heterologous system [25], however, our *in vivo* analysis  
414 suggests the possibility of an indirect interaction. The deletions and chimeric forms of Tmie in  
415 the present study highlight important motifs or regions of Tmie that are critical for localization of  
416 the Tmcs to the hair bundle.

417

#### 418 **The first hydrophobic helix of Tmie is dispensable**

419 The membrane topology of Tmie has not been biochemically determined, however,  
420 online *Phobius* software predicts an N-terminal signal peptide in mouse and human TMIE and a  
421 transmembrane helix in zebrafish Tmie [40]. Interestingly, the orthologues in *C. elegans* or  
422 *Drosophila* do not contain this first hydrophobic region of Tmie. Upon removal of this region,  
423 we observed that SP44-231 behaved like full-length Tmie, with a comparable pattern of

424 localization and full functional rescue of *tmie*-deficient fish. In addition, SP44-231 rescues  
425 Tmc2b-GFP bundle expression to wild type levels or higher. To our knowledge, these results are  
426 the first *in vivo* evidence that Tmie can function without the putative first transmembrane  
427 domain. Our study supports the notion that Tmie undergoes cleavage, resulting in a single-pass  
428 membrane protein that functions in the MET complex (Fig 8B).

429

### 430 **The 2TM domain and adjacent regions of Tmie are functionally significant**

431 The key functional domains of Tmie are located within and proximal to the remaining  
432 transmembrane domain. We found that replacement of the entire transmembrane domain with an  
433 exogenous membrane helix from the CD8 glycoprotein resulted in a protein that trafficked to the  
434 bundles of immature hair cells but was not expressed in mature bundles. This finding  
435 demonstrates that this domain is vital for stable localization of Tmie in mature hair cells. Half-  
436 chimeras of this domain revealed that the mislocalization effect is exclusive to the first half of  
437 the helix, but that both halves are functionally significant (the first half more so than the second).  
438 These results suggest that the transmembrane domain is critical for both Tmie's localization and  
439 function in the MET complex.

440 Removal of the cytoplasmic amino acids 97-113, directly after the 2TM, leads to a  
441 normal localization pattern but complete loss of function. This region contains arginine residues  
442 that have previously been implicated in human deafness [23, 41-43]. Mimics of these mutations  
443 in mouse cochlear hair cells lead to altered MET currents, which has been attributed to a  
444 reduction in binding to PCDH15-CD2 [25]. Interestingly, one of the mouse mutations, R93W,  
445 resulted in loss of TMIE localization at the site of MET. In contrast to these findings, when we  
446 remove this entire intracellular region from zebrafish Tmie, it is still capable of localization in

447 hair bundles. This result may reflect species differences in recognition sequences for trafficking  
448 machinery.

449         The SP63-231 and  $\Delta$ 63-73 constructs both lack different segments of the extracellular  
450 region of Tmie. These were the only two constructs with dominant negative effects, suggesting  
451 that each construct successfully integrates into the MET complex and interferes or competes with  
452 endogenous Tmie. Both constructs only minimally rescue mechanosensitivity in *tmie<sup>ru1000</sup>*  
453 mutants and are thus predicted to weaken the efficiency of the MET complex. Other constructs  
454 such as the transmembrane chimeras also yield partial rescue but do not appear to affect the  
455 function of endogenous Tmie in wild-type hair cells. These data suggest that the full 2TM  
456 domain is required to produce the dominant negative effect on endogenous Tmie. Combined with  
457 the finding that replacement of the 2TM with an unrelated helix causes instability of Tmie in  
458 mature hair cells, we suggest that the 2TM is essential in integrating Tmie into the MET  
459 complex.

460

#### 461 **Impaired functionality corresponds to decreased Tmc expression**

462         When co-expressed with Tmc2b-GFP, our Tmie constructs reveal a strong link between  
463 function and Tmc bundle expression (Figs 7 and S3). In larvae expressing CD8-2TM and  $\Delta$ 97-  
464 113, both of which display little or no functional rescue, there is no detectable Tmc2b-GFP in the  
465 hair bundle (Fig 7E, 7G and 7H). In addition to defects in targeting Tmcs to the hair bundle, our  
466 data also suggest a role for Tmie in maintaining the levels of Tmc2b in stereocilia. The most  
467 dramatic effect on maintenance of Tmc signal in the bundle was seen in *tmie<sup>ru1000</sup>* larvae  
468 expressing the  $\Delta$ 63-73 construct. In these larvae, Tmc2b-GFP successfully traffics to the bundle  
469 in immature hair cells (Fig 7D, arrows) but does not maintain strong expression in mature cells

470 (S4 Fig). Based on this data, we conclude that the first half of the transmembrane domain and the  
471 intracellular residues 97-113 are involved in trafficking the Tmcs to the site of MET, while the  
472 extracellular residues 63-73 stabilize Tmc expression in the MET complex (Fig 8B).

473 Surprisingly, SP63-231 and 2TM-CD8 rescue Tmc2b-GFP to wild type levels (Fig 7C,  
474 7F and 7H), even though functional rescue of *tmie*<sup>ru1000</sup> by GFP-tagged versions was reduced in  
475 both FM labeling experiments (Fig 5) and microphonic recordings of the inner ear (Fig 6). This  
476 result hints at an additional role for Tmie in MET that is independent of Tmc trafficking.  
477 However, the low level of functional rescue in *tmie*<sup>ru1000</sup> mutants by these two constructs was  
478 only observed in the background of endogenous levels of the Tmcs. When we co-expressed  
479 Tmc2b-GFP with either SP63-231 or 2TM-CD8, then the functional rescue of *tmie*<sup>ru1000</sup>  
480 mechanosensitivity improved in a Tmc-dose-dependent manner (S3 Fig). Since co-expression of  
481 Tmc2b-GFP can overcome the functional deficit in SP63-231 and 2TM-CD8, we propose that  
482 residues 44-62 and the second half of the 2TM are important but not absolutely essential to  
483 regulating Tmc bundle expression. This finding reinforces the significance of our findings with  
484 the constructs  $\Delta$ 63-73, CD8-2TM, and  $\Delta$ 97-113, which still fail to rescue Tmc2b-GFP levels  
485 even when Tmc2b-GFP is co-expressed.

486 Through a systematic *in vivo* analysis of *tmie* via transgenic expression, we identified  
487 new functional domains of Tmie. We demonstrated a strong link between Tmie's function and  
488 Tmc1/2 expression in the bundle. Evidence continues to mount that the Tmcs are subunits of the  
489 MET channel, and our results implicate Tmie in promoting and maintaining the localization of  
490 Tmc subunits at the site of MET. The precise mechanism underlying Tmie's regulation of the  
491 Tmcs awaits further investigation.

492

## 493 **Methods**

494

### 495 **Zebrafish husbandry**

496 Zebrafish (*Danio rerio*, txid7955) were maintained at 28°C and bred according to  
497 standard conditions. All animal research was in compliance with guidelines from the Institutional  
498 Animal Care and Use Committee at Oregon Health and Science University. In this study, the  
499 following zebrafish mutant lines were used: *tmie<sup>ru1000</sup>* [21], *tmie<sup>t26171</sup>*, *pcdh15a<sup>psi7</sup>* [9],  
500 *lhfp15a<sup>tm290d</sup>* [44], *tmc2b<sup>sa8817</sup>* [11]. All zebrafish lines in this study were maintained in a  
501 Tübingen or Top long fin wild type background. We examined larvae at 4-7 days post-  
502 fertilization (dpf), of undifferentiated sex. For experiments involving single transgenes, non-  
503 transgenic *tmie<sup>ru1000</sup>* heterozygotes were crossed to transgenic fish in the homozygous or  
504 heterozygous *tmie<sup>ru1000</sup>* background. Mutants were genotyped by PCR and subsequent digestion  
505 or DNA sequencing. Primers are listed in Table 1.

506 **Table 1. List of primers used in this study.**

| <i>Primers for plasmid construction</i> |                                                                                                                    |                                                                  |
|-----------------------------------------|--------------------------------------------------------------------------------------------------------------------|------------------------------------------------------------------|
| Plasmid                                 | Forward (5' - 3')                                                                                                  | Reverse (5' - 3')                                                |
| pME-Tmie                                | GGGGACAAGTTTGTACAAAAAAGCAGGCTCCAAAC<br>ATGAGACGCGGGAGAAGAA                                                         | GGGGACCACTTTGTACAAGAAAGCTGGGTC<br>TTTCTTCGAGGCTTCTTGG            |
| pME-SP44-231                            | GGGGACAAGTTTGTACAAAAAAGCAGGCTCCAAAC<br>ATGATTTTGTGCGGTCTCCTTTTACCCGCGTTATGG<br>GGACTGGCGCTCGGCCAGATACCAGACCCAGAGCT | same as pME-Tmie                                                 |
| pME-SP63-231                            | ACCTCAGAAACAGTGGTGTGGGGA                                                                                           | GCCGAGCGCCAGTCCC                                                 |
| pME-Δ63-73                              | TTATGGCAGGTTGTGGGCATTTTC                                                                                           | GACGGGGTCTGGCTTTTTCG                                             |
| pME-CD8                                 | PCR 1                                                                                                              | same as pME-Tmie                                                 |
|                                         | PCR 2                                                                                                              | TTGTGGGGTCTTCTCTGTCAGTGGTTATCACCTT<br>TTACTGCAAATGCCGAATCCCAC    |
| pME-CD8-2TM                             | PCR 1                                                                                                              | ATGAGACGCGGGAGAAGAAGAGGGAAAATG                                   |
|                                         | PCR 2                                                                                                              | TGGCCGGGACTTGTGGGATCTTAGCAATAATAATTA<br>CGCTCTGCTGCATCTTCAAATGCC |
| pME-2TM-CD8                             | PCR 1                                                                                                              | same as pME-CD8-2TM                                              |
|                                         | PCR 2                                                                                                              | CCTTCTCTGTCAGTGGTTATCACCTTTACTGCAA<br>ATGCCGAATCCCACGGAGC        |
| pME-Δ97-113                             | AGACTTGCTGCGAAAAATTATGCCAAC                                                                                        | GAAGATGCAGCAGAGCGTAATTATTATTGC                                   |
| pME-Δ114-138                            | GCGGCAAAGTTGAGGTGAAG                                                                                               | TTGCGCGTGCCGAGC                                                  |
| pME-1-138                               | same as pME-Tmie                                                                                                   | GGGGACCACTTTGTACAAGAAAGCTGGGTC<br>GCCGGGCACCTCAG                 |
| pME-1-113                               | same as pME-Tmie                                                                                                   | GGGGACCACTTTGTACAAGAAAGCTGGGTC<br>TTGCGCGTGCCGAG                 |
| pME-Tmie-short                          | same as pME-Tmie                                                                                                   | GGGGACCACTTTGTACAAGAAAGCTGGGTC<br>AGTGCCAGGATTGGCTG              |

| <i>Primers for RT-PCR</i> |                                          |                                           |
|---------------------------|------------------------------------------|-------------------------------------------|
| To amplify:               | Forward (5' - 3')                        | Reverse (5' - 3')                         |
| t26171 cDNA               | ATATGCCAACACATTGGAGACGGTGC               | CCCTGAGGTGTGTGAGTGTTC                     |
| Tmie-short transcript     | ATGAGACGCCCCAGAAGAAGAGGGAAAATGGCGAT<br>G | TTAAGTGCCAGGATTGGCCGGTTCATCTTCT<br>TCCCTG |

| <i>Primers for identifying mutants</i> |                       |                      |
|----------------------------------------|-----------------------|----------------------|
| Mutant                                 | Forward (5' - 3')     | Reverse (5' - 3')    |
| ru1000                                 | TGTTTCGTCAGGCTGAAG    | GGCCTATAAAACACAAGCA  |
| psi7                                   | TTGGCACCCTATCTTACCG   | ACAGAAGGCACCTGGAAAAC |
| tm290d                                 | TGGTCTTCATCCAGCCCTAC  | CGATCAGCAGCAAAGAGATG |
| tk256c                                 | TGTGTATTGCAGGTCAGTGTG | AAGCGTTTTCTGGGTGTTG  |
| t26171                                 | GCACAGCCCTAATGGATACAG | GCTTCTTCTTTGGTGTCTCT |

507



508 **Gene accession numbers for mutants and transgenes**

509 *tmie* (accession no. F1QA80), *tmc1* (accession no. F1QFU0), *tmc2b* (accession no.  
510 F1QZE9), *tomt* (accession no. A0A193KX02), *pcdh15a* (accession no. Q5ICW6), *lhfp15a*  
511 (accession no. F1Q837), *actba* (accession no. Q7ZVI7).

512

513 **Transgenic lines and plasmid construction**

514 The following previously published transgenic lines were used: *Tg(-6myo6b:β-actin-*  
515 *GFP-pA)* [34], *Tg(-6myo6b:pcdh15aCD3-mEGFP-pA)* [17], and *Tg(-6myo6b:GFP-lhfp15a-pA)*,  
516 *Tg(-6myo6b:Tmc1-mEGFP-pA)*, *Tg(-6myo6b:Tmc2b-mEGFP-pA)* [11].

517 To generate the *tmie* expression vectors, we used the Tol2/Gateway system [45]. The  
518 pDestination vector contained either a *cmlc2:GFP* heart marker or *α-ACry:mCherry* eye marker  
519 for sorting. pDESTtol2pACrymCherry was a gift from Joachim Berger and Peter Currie  
520 (Addgene plasmid # 64023, [46]).

521 The 5' entry vector contained the promoter for the *myosin 6b* gene, which drives  
522 expression only in hair cells. All *tmie* transgenic constructs were subcloned into the middle entry  
523 vector using PCR or bridging PCR and confirmed by sequencing. The primers for each vector  
524 are listed in Table 1. For GFP-tagging, we used a 3' entry vector with a flexible linker  
525 (GHGTGSTGSGSS) followed by *mEGFP*. For *NLS(mCherry)* experiments, a p2A self-cleaving  
526 peptide (GSGATNFSLLKQAGDVEENPGP) was interposed between the *tmie* construct and the  
527 *NLS(mCherry)*. This causes translation of a fusion protein that is subsequently cleaved into the  
528 two final proteins. The 2TM helix replacements from residues 21-43 result in the following  
529 chimeric helices: CD8 (YIWAPLAGTTCGVLLLSLVITLYC), CD8-2TM  
530 (YIWAPLAGTCGILAIITLCCIF), and 2TM-CD8 (LWQVVGIFSMFVLLLSLVITLYC).

531 Multisite Gateway LR reactions [47, 48] were performed to generate the following  
532 constructs: *pDest(-6myo6b:tmie-GFP-pA)*, *pDest(-6myo6b:tmie-short-GFP-pA)*, *pDest(-*  
533 *6myo6b:SP44-231-GFP-pA)*, *pDest(-6myo6b:SP63-231-GFP-pA)*, *pDest(-6myo6b:Δ63-73-*  
534 *GFP-pA)*, *pDest(-6myo6b:CD8-GFP-pA)*, *pDest(-6myo6b:CD8-2TM-GFP-pA)*, *pDest(-*  
535 *6myo6b:2TM-CD8-GFP-pA)*, *pDest(-6myo6b:Δ97-113-GFP-pA)*, *pDest(-6myo6b:Δ114-138-*  
536 *GFP-pA)*, *pDest(-6myo6b:1-113-GFP-pA)*, *pDest(-6myo6b:1-138-GFP-pA)*, *pDest(-*  
537 *6myo6b:tmie-p2A-NLS(mCherry)-pA)*, *pDest(-6myo6b:SP63-231-p2A-NLS(mCherry)-pA)*,  
538 *pDest(-6myo6b:Δ63-73-p2A-NLS(mCherry)-pA)*, *pDest(-6myo6b:CD8-2TM-p2A-*  
539 *NLS(mCherry)-pA)*, *pDest(-6myo6b:Δ97-113-p2A-NLS(mCherry)-pA)*.

540 To generate transgenic fish, plasmid DNA and *tol2* transposase mRNA were co-injected  
541 into single-cell fertilized eggs, as previously described (Kwan et al., 2007). For each construct,  
542 200+ eggs from an incross of *tmie<sup>ru1000</sup>* heterozygotes were injected. To obtain stable transgenic  
543 lines, >24 larvae with strong marker expression were raised as potential founders. For each GFP-  
544 tagged transgene, at least two founder lines were generated and examined for visible bundle  
545 expression. For each *tmie* construct, we isolated a line containing single transgene insertions,  
546 with the exception of the *CD8-2TM* construct in which we identified a single founder with high  
547 transmission of the transgene (>10%) and used these offspring and their siblings for FM and  
548 microphonics experiments. For *NLS(mCherry)* experiments, injected fish were raised to  
549 adulthood and genotyped to identify *tmie<sup>ru1000</sup>* heterozygotes and homozygotes. We identified  
550 founders for each construct and then crossed these founders to *tmie<sup>ru1000</sup>* heterozygotes carrying  
551 *Tg(myo6b:tmc2b-GFP)*. This generated offspring that expressed both transgenes in the *tmie<sup>ru1000</sup>*  
552 mutant background, and we used these larvae for experiments. In *SP44-231*, *SP63-231*, and

553 *CD8-2TM*, stable transgenic lines were generated from the founder before experiments were  
554 carried out.

555

## 556 **Microscopy**

557 Live larvae were anesthetized with E3 plus 0.03% 3-amino benzoic acid ethylester  
558 (MESAB; Western Chemical) and mounted in 1.5% low-melting-point agarose (Sigma-Aldrich  
559 cas. # 39346-81-1), with the exception of the morphology images from Fig 1A and Fig 6A in  
560 which larvae were pinned with glass rods and imaged in E3 or extracellular solution containing  
561 MESAB. The image in Fig 6A was captured at room temperature using a Hamamatsu digital  
562 camera (C11440, ORCA-flash2.8), MetaMorph Advanced NX software, and an upright Leica  
563 DMLFS microscope. We used differential interference contrast (DIC) with a Leica HC PL  
564 Fluotar 10x/0.3 lens. For all imaging except Fig 6A, images were captured at room temperature  
565 using an Axiocam MrM camera, Zeiss Zen software, and an upright Zeiss LSM700 laser-  
566 scanning confocal microscope. We used DIC with one of two water-immersion lenses: Plan  
567 Apochromat 40x/1.0 DIC, or Acroplan 63x/0.95 W. Laser power and gain were unique for each  
568 fluorophore to prevent photobleaching. We averaged 2 or 4x for each image, consistent within  
569 each experiment. The *Tmc1*-GFP and *Tmc2b*-GFP transgenes are very dim, and high laser power  
570 (4%) and gain (1100) were necessary. At these settings, autofluorescence from other  
571 wavelengths can falsely enhance the emission peak at 488. To filter out this autofluorescence, we  
572 simultaneously collected light on a second channel with an emission peak at 640 nm.

573

574 **Auditory Evoked Behavioral Response (AEBR)**

575 Experiments were conducted as previously described [49]. Wild type and mutant larvae  
576 were sorted by FM 1-43 labeling. Briefly, 6 dpf larvae were placed in six central wells of a 96-  
577 well microplate mounted on an audio speaker. Pure tones were played every 15 s for 3 min  
578 (twelve 100 ms stimuli at 1 kHz, sound pressure level 157 dB, denoted by asterisks in Fig 1B).  
579 Responses were recorded in the dark inside a Zebrabox monitoring system (ViewPoint Life  
580 Sciences). Peaks represent pixel changes from larval movement. A response was considered  
581 positive if it occurred within two seconds after the stimulus and surpassed threshold to be  
582 considered evoked, not spontaneous (Fig 1B, green indicates movement detected, magenta  
583 indicates threshold surpassed). For each larva, we used the best response rate out of three trials.  
584 Response was quantified by dividing the number of positive responses by total stimuli (12) and  
585 converting to a percent. If the larvae moved within two seconds before a stimulus, that stimulus  
586 was dropped from the trial data set (i.e. the number of total stimuli would become 11). Each data  
587 point on the graph in Fig 1C is the percent response of an individual larva. We used a two-tailed  
588 unpaired t-test with Welch's correction to determine significance, \*\*\*\*p<0.0001.

589

590 **FM 1-43 and FM 4-64 labeling**

591 Larvae were briefly exposed to E3 containing either 3 $\mu$ M N-(3-  
592 Triethylammoniumpropyl)-4-(4-(Dibutylamino)styryl)Pyridinium Dibromide (FM 1-43, Life  
593 Technologies) or 3 $\mu$ M of the red-shifted *N[scap]*-(3-triethylammoniumpropyl)-4-(6-(4-  
594 (diethylamino)phenyl)hexatrienyl)pyridinium dibromide (FM4-64; Invitrogen). After exposure  
595 for 25-30 seconds, larvae were washed 3x in E3. Laser power was adjusted for each experiment  
596 to avoid saturation of pixels but was consistent within a clutch. FM levels were quantified in

597 ImageJ [50] as described previously [9]. In brief, maximum projections of each neuromast were  
598 generated using seven optical sections, beginning at the cuticular plate and moving down through  
599 the soma (magenta bracket, Fig 1G). We then measured the integrated density of the channel  
600 with an emission peak at 640 nm for FM 4-64, and at 488 nm for FM 1-43. This integrated  
601 density value was divided by the number of cells, thus converting each neuromast into a single  
602 plot point of integrated density per cell (IntDens/cell). Statistical analyses were always  
603 performed between direct siblings. For Fig 5, individual values were divided by the mean of the  
604 sibling wild type neuromasts in order to display the data as a percent of wild type, making it  
605 easier to compare across groups. Statistical significance was determined within an individual  
606 clutch using one-way ANOVA.

607

## 608 **Microphonics**

609 Larvae at 3 dpf were anesthetized in extracellular solution (140mM NaCl, 2mM KCl,  
610 2mM CaCl<sub>2</sub>, 1mM MgCl<sub>2</sub>, and 10mM 4-(2-hydroxyethyl)-1-piperazineethanesulfonic acid  
611 (HEPES); pH 7.4) containing 0.02% 3-amino benzoic acid ethylester (MESAB; Western  
612 Chemical). Two glass fibers straddled the yolk to pin the larvae against a perpendicular cross-  
613 fiber. Recording pipettes were pulled from borosilicate glass with filament, O.D.: 1.5 mm, O.D.:  
614 0.86 mm, 10 cm length (Sutter, item # BF150-86-10, fire polished). Using the Sutter Puller  
615 (model P-97), we pulled the pipettes into a long shank with a resistance of 10-20M $\Omega$ . We then  
616 used a Sutter Beveler with impedance meter (model BV-10C) to bevel the edges of the recording  
617 pipettes to a resistance of 3-6 M $\Omega$ . We pulled a second pipette to a long shank and fire polished  
618 to a closed bulb, and then attached this rod to a piezo actuator (shielded with tin foil). The rod  
619 was then pressed to the front of the head behind the lower eye, level with the otoliths in the ear

620 of interest, to hold the head in place while the recording pipette was advanced until it pierced the  
621 inner ear cover. Although it has been demonstrated that size of response is unchanged by entry  
622 point [51], we maintained a consistent entry point dorsal to the anterior crista and lateral to the  
623 posterior crista (see Fig 6A). After the recording pipette was situated, the piezo pipette was then  
624 moved back to a position in light contact with the head. We drove the piezo with a High Power  
625 Amplifier (piezosystem jena, System ENT/ENV, serial # E18605), and recorded responses in  
626 current clamp mode with a patch-clamp amplifier (HEKA, EPC 10 usb double, serial # 550089).  
627 Each stimulus was of 20 ms duration, with 20 ms pre- and post-stimulus periods. We used either  
628 a sine wave or a voltage step and recorded at 20 kHz, collecting 200 traces per experiment. In  
629 Fig 1H, we used a 200 Hz sine wave at 10V, based on reports that 200 Hz elicited the strongest  
630 response [52]. In Fig 6, we used multiple step stimuli at varying voltages (2V, 3V, 4V, 5V, 6V,  
631 and 10V). The piezo signal was low-pass filtered at 500Hz using the Low-Pass Bessel Filter 8  
632 Pole (Warner Instruments). Microphonic potential responses were amplified 1000x and filtered  
633 between 0.1-3000 Hz by the Brownlee Precision Instrumentation Amplifier (Model 440). We  
634 used Igor Pro for analysis. We averaged each set of 200 traces to generate one trace response per  
635 fish, then measured baseline-to-peak amplitude. These amplitudes were used to generate the  
636 graphs in Fig 6. Statistical significance was determined by 2-way ANOVA comparing all groups  
637 to wild type non-transgenic siblings.

638

### 639 **Quantification of Tg(myo6b:Tmc1-GFP) and Tg(myo6b:Tmc2b-GFP) in the ROI**

640 Using ImageJ, maximum projections of each crista were generated for analysis (5  
641 sections per stack for Tmc1-GFP in Fig 3D and Tmc2b-GFP in Fig 3F, and 13 sections per stack  
642 for Tmc2b-GFP in Figs 3H and 7). Quantification of Tmc-GFP bundle fluorescence in Fig 3 was

643 achieved by outlining each bundle to encompass the entire region of interest (ROI) in a single  
644 hand-drawn area (Fig 7A, right panel, black outline). In the ROI, we quantified the integrated  
645 density of the channel with an emission peak at 480 nm. This was repeated in the region above  
646 the bundles containing only inner ear fluid and the kinocilia in order to subtract background  
647 fluorescence. Each middle crista generated one data point on the graphs in Figs 3 and 7. In some  
648 cases, we saw single cells that appeared to have a GFP-fill, probably due to clipping of the GFP  
649 tag. We excluded these cells from analyses, since they falsely increased the signal. Due to the 3D  
650 nature of the mound-shaped cristae, it was difficult to completely exclude the apical soma region,  
651 leading the signals of *tmie<sup>ru1000</sup>* to average above zero. We used the Kruskal-Wallis test for the  
652 SP44-231, SP63-231, and 2TM-CD8 constructs; all others are one-way ANOVA.

653

#### 654 **cDNA generation by Reverse Transcription Polymerase Chain Reaction (RT-PCR)**

655 We sorted 30 wild type and 30 *t26171* larvae by behavior (tap sensitivity and balance  
656 defect at 5 dpf) and extracted RNA using the RNeasy mini kit (Qiagen). Larvae were  
657 homogenized using a 1ml syringe. To generate the cDNA for the short isoform of Tmie (Tmie-  
658 short) and the *t26171* allele, we performed RT-PCR on these RNA samples using the RNA to  
659 cDNA EcoDry Premix (Clontech, Cat # 639549). Primers are listed in Table 1. Both transcripts  
660 were verified by DNA sequencing.

661

#### 662 **Acknowledgements**

663 The authors thank Cecilia Toro, Lucille Moore, and Andre Dagostin for help with  
664 execution and analysis of the microphonics experiments, as well as Larry Trussell, Josef Trapani,  
665 and Anthony Ricci for advice. We thank Jim Hudspeth for the *tmie<sup>ru1000</sup>* fish line. We also thank

666 Eliot Smith for feedback on the manuscript, and Leah Snyder and Lisa Hiyashi for laboratory  
667 support.

## 668 **References**

- 669 1. Kozlov AS, Risler T, Hudspeth AJ. Coherent motion of stereocilia assures the concerted  
670 gating of hair-cell transduction channels. *Nature neuroscience*. 2007;10(1):87-92.
- 671 2. Beurg M, Fettiplace R, Nam JH, Ricci AJ. Localization of inner hair cell  
672 mechanotransducer channels using high-speed calcium imaging. *Nature neuroscience*.  
673 2009;12(5):553-8.
- 674 3. Kurima K, Ebrahim S, Pan B, Sedlacek M, Sengupta P, Millis BA, et al. TMC1 and  
675 TMC2 Localize at the Site of Mechanotransduction in Mammalian Inner Ear Hair Cell  
676 Stereocilia. *Cell reports*. 2015;12(10):1606-17.
- 677 4. Hudspeth AJ. How the ear's works work. *Nature*. 1989;341(6241):397-404.
- 678 5. Kurima K, Peters LM, Yang Y, Riazuddin S, Ahmed ZM, Naz S, et al. Dominant and  
679 recessive deafness caused by mutations of a novel gene, TMC1, required for cochlear hair-cell  
680 function. *Nature genetics*. 2002;30(3):277-84.
- 681 6. Kawashima Y, Geleoc GS, Kurima K, Labay V, Lelli A, Asai Y, et al.  
682 Mechanotransduction in mouse inner ear hair cells requires transmembrane channel-like genes.  
683 *The Journal of clinical investigation*. 2011;121(12):4796-809.
- 684 7. Pan B, Geleoc GS, Asai Y, Horwitz GC, Kurima K, Ishikawa K, et al. TMC1 and TMC2  
685 are components of the mechanotransduction channel in hair cells of the mammalian inner ear.  
686 *Neuron*. 2013;79(3):504-15.



- 687 8. Beurg M, Xiong W, Zhao B, Muller U, Fettiplace R. Subunit determination of the  
688 conductance of hair-cell mechanotransducer channels. *Proceedings of the National Academy of*  
689 *Sciences of the United States of America*. 2015;112(5):1589-94.
- 690 9. Maeda R, Kindt KS, Mo W, Morgan CP, Erickson T, Zhao H, et al. Tip-link protein  
691 protocadherin 15 interacts with transmembrane channel-like proteins TMC1 and TMC2.  
692 *Proceedings of the National Academy of Sciences of the United States of America*.  
693 2014;111(35):12907-12.
- 694 10. Chou SW, Chen Z, Zhu S, Davis RW, Hu J, Liu L, et al. A molecular basis for water  
695 motion detection by the mechanosensory lateral line of zebrafish. *Nature communications*.  
696 2017;8(1):2234.
- 697 11. Erickson T, Morgan CP, Olt J, Hardy K, Busch-Nentwich E, Maeda R, et al. Integration  
698 of Tmc1/2 into the mechanotransduction complex in zebrafish hair cells is regulated by  
699 Transmembrane O-methyltransferase (Tomt). *eLife*. 2017;6.
- 700 12. Beurg M, Cui R, Goldring AC, Ebrahim S, Fettiplace R, Kachar B. Variable number of  
701 TMC1-dependent mechanotransducer channels underlie tonotopic conductance gradients in the  
702 cochlea. *Nature communications*. 2018;9(1):2185.
- 703 13. Corns LF, Johnson SL, Kros CJ, Marcotti W. Tmc1 Point Mutation Affects Ca<sup>2+</sup>  
704 Sensitivity and Block by Dihydrostreptomycin of the Mechanoelectrical Transducer Current of  
705 Mouse Outer Hair Cells. *The Journal of neuroscience : the official journal of the Society for*  
706 *Neuroscience*. 2016;36(2):336-49.
- 707 14. Corns LF, Jeng JY, Richardson GP, Kros CJ, Marcotti W. TMC2 Modifies Permeation  
708 Properties of the Mechanoelectrical Transducer Channel in Early Postnatal Mouse Cochlear  
709 Outer Hair Cells. *Frontiers in molecular neuroscience*. 2017;10:326.

- 710 15. Indzhykulian AA, Stepanyan R, Nelina A, Spinelli KJ, Ahmed ZM, Belyantseva IA, et al.  
711 Molecular remodeling of tip links underlies mechanosensory regeneration in auditory hair cells.  
712 PLoS biology. 2013;11(6):e1001583.
- 713 16. Kazmierczak P, Sakaguchi H, Tokita J, Wilson-Kubalek EM, Milligan RA, Muller U, et  
714 al. Cadherin 23 and protocadherin 15 interact to form tip-link filaments in sensory hair cells.  
715 Nature. 2007;449(7158):87-91.
- 716 17. Maeda R, Pacentine IV, Erickson T, Nicolson T. Functional Analysis of the  
717 Transmembrane and Cytoplasmic Domains of Pcdh15a in Zebrafish Hair Cells. The Journal of  
718 neuroscience : the official journal of the Society for Neuroscience. 2017;37(12):3231-45.
- 719 18. Xiong W, Grillet N, Elledge HM, Wagner TF, Zhao B, Johnson KR, et al. TMHS is an  
720 integral component of the mechanotransduction machinery of cochlear hair cells. Cell.  
721 2012;151(6):1283-95.
- 722 19. Giese APJ, Tang YQ, Sinha GP, Bowl MR, Goldring AC, Parker A, et al. CIB2 interacts  
723 with TMC1 and TMC2 and is essential for mechanotransduction in auditory hair cells. Nature  
724 communications. 2017;8(1):43.
- 725 20. Mitchem KL, Hibbard E, Beyer LA, Bosom K, Dootz GA, Dolan DF, et al. Mutation of  
726 the novel gene Tmie results in sensory cell defects in the inner ear of spinner, a mouse model of  
727 human hearing loss DFNB6. Human molecular genetics. 2002;11(16):1887-98.
- 728 21. Gleason MR, Nagiel A, Jamet S, Vologodskaja M, Lopez-Schier H, Hudspeth AJ. The  
729 transmembrane inner ear (Tmie) protein is essential for normal hearing and balance in the  
730 zebrafish. Proceedings of the National Academy of Sciences of the United States of America.  
731 2009;106(50):21347-52.

- 732 22. Shen YC, Jeyabalan AK, Wu KL, Hunker KL, Kohrman DC, Thompson DL, et al. The  
733 transmembrane inner ear (tmie) gene contributes to vestibular and lateral line development and  
734 function in the zebrafish (*Danio rerio*). *Dev Dyn*. 2008;237(4):941-52.
- 735 23. Naz S, Giguere CM, Kohrman DC, Mitchem KL, Riazuddin S, Morell RJ, et al.  
736 Mutations in a novel gene, TMIE, are associated with hearing loss linked to the DFNB6 locus.  
737 *American journal of human genetics*. 2002;71(3):632-6.
- 738 24. Cho KI, Suh JG, Lee JW, Hong SH, Kang TC, Oh YS, et al. The circling mouse  
739 (*C57BL/6J-cir*) has a 40-kilobase genomic deletion that includes the transmembrane inner ear  
740 (tmie) gene. *Comparative medicine*. 2006;56(6):476-81.
- 741 25. Zhao B, Wu Z, Grillet N, Yan L, Xiong W, Harkins-Perry S, et al. TMIE is an essential  
742 component of the mechanotransduction machinery of cochlear hair cells. *Neuron*.  
743 2014;84(5):954-67.
- 744 26. Park S, Lee JH, Cho HJ, Lee KY, Kim MO, Yun BW, et al. tmie Is required for  
745 gentamicin uptake by the hair cells of mice. *Comparative medicine*. 2013;63(2):136-42.
- 746 27. Gale JE, Marcotti W, Kennedy HJ, Kros CJ, Richardson GP. FM1-43 dye behaves as a  
747 permeant blocker of the hair-cell mechanotransducer channel. *The Journal of neuroscience : the*  
748 *official journal of the Society for Neuroscience*. 2001;21(18):7013-25.
- 749 28. Meyers JR, MacDonald RB, Duggan A, Lenzi D, Standaert DG, Corwin JT, et al.  
750 Lighting up the senses: FM1-43 loading of sensory cells through nonselective ion channels. *The*  
751 *Journal of neuroscience : the official journal of the Society for Neuroscience*. 2003;23(10):4054-  
752 65.

- 753 29. Shin MJ, Lee JH, Yu DH, Kim HJ, Bae KB, Yuh HS, et al. Spatiotemporal expression of  
754 tmie in the inner ear of rats during postnatal development. *Comparative medicine*.  
755 2010;60(4):288-94.
- 756 30. Su MC, Yang JJ, Chou MY, Hsin CH, Su CC, Li SY. Expression and localization of  
757 Tmie in adult rat cochlea. *Histochemistry and cell biology*. 2008;130(1):119-26.
- 758 31. Webb SW, Grillet N, Andrade LR, Xiong W, Swarthout L, Della Santina CC, et al.  
759 Regulation of PCDH15 function in mechanosensory hair cells by alternative splicing of the  
760 cytoplasmic domain. *Development (Cambridge, England)*. 2011;138(8):1607-17.
- 761 32. Seiler C, Finger-Baier KC, Rinner O, Makhankov YV, Schwarz H, Neuhauss SC, et al.  
762 Duplicated genes with split functions: independent roles of protocadherin15 orthologues in  
763 zebrafish hearing and vision. *Development (Cambridge, England)*. 2005;132(3):615-23.
- 764 33. Clemens Grisham R, Kindt K, Finger-Baier K, Schmid B, Nicolson T. Mutations in  
765 ap1b1 cause mistargeting of the Na(+)/K(+)-ATPase pump in sensory hair cells. *PloS one*.  
766 2013;8(4):e60866.
- 767 34. Kindt KS, Finch G, Nicolson T. Kinocilia mediate mechanosensitivity in developing  
768 zebrafish hair cells. *Developmental cell*. 2012;23(2):329-41.
- 769 35. Cunningham CL, Wu Z, Jafari A, Zhao B, Schrode K, Harkins-Perry S, et al. The murine  
770 catecholamine methyltransferase mTOMT is essential for mechanotransduction by cochlear hair  
771 cells. *eLife*. 2017;6.
- 772 36. Karuppasamy S, Nam YY, Jung H, Suh JG. Expression of deafness protein Tmie in  
773 postnatal developmental stages of C57BL/6J mice. *Laboratory Animal Research*.  
774 2012;28(2):147-50.

- 775 37. Shin MJ, Lee JH, Yu DH, Kim BS, Kim HJ, Kim SH, et al. Ectopic expression of tmie  
776 transgene induces various recovery levels of behavior and hearing ability in the circling mouse.  
777 *Biochemical and biophysical research communications*. 2008;374(1):17-21.
- 778 38. Mahendrasingam S, Fettiplace R, Alagramam KN, Cross E, Furness DN. Spatiotemporal  
779 changes in the distribution of LHFPL5 in mice cochlear hair bundles during development and in  
780 the absence of PCDH15. *PloS one*. 2017;12(10):e0185285.
- 781 39. Senften M, Schwander M, Kazmierczak P, Lillo C, Shin JB, Hasson T, et al. Physical and  
782 functional interaction between protocadherin 15 and myosin VIIa in mechanosensory hair cells.  
783 *The Journal of neuroscience : the official journal of the Society for Neuroscience*.  
784 2006;26(7):2060-71.
- 785 40. Kall L, Krogh A, Sonnhammer EL. A combined transmembrane topology and signal  
786 peptide prediction method. *Journal of molecular biology*. 2004;338(5):1027-36.
- 787 41. Ganapathy A, Pandey N, Srisailapathy CR, Jalvi R, Malhotra V, Venkatappa M, et al.  
788 Non-syndromic hearing impairment in India: high allelic heterogeneity among mutations in  
789 TMPRSS3, TMC1, USH1C, CDH23 and TMIE. *PloS one*. 2014;9(1):e84773.
- 790 42. Santos RL, El-Shanti H, Sikandar S, Lee K, Bhatti A, Yan K, et al. Novel sequence  
791 variants in the TMIE gene in families with autosomal recessive nonsyndromic hearing  
792 impairment. *Journal of molecular medicine (Berlin, Germany)*. 2006;84(3):226-31.
- 793 43. Sirmaci A, Ozturkmen-Akay H, Erbek S, Incesulu A, Duman D, Tasir-Yilmaz S, et al. A  
794 founder TMIE mutation is a frequent cause of hearing loss in southeastern Anatolia. *Clinical  
795 genetics*. 2009;75(6):562-7.
- 796 44. Obholzer N, Wolfson S, Trapani JG, Mo W, Nechiporuk A, Busch-Nentwich E, et al.  
797 Vesicular glutamate transporter 3 is required for synaptic transmission in zebrafish hair cells.

- 798 The Journal of neuroscience : the official journal of the Society for Neuroscience.  
799 2008;28(9):2110-8.
- 800 45. Kwan KM, Fujimoto E, Grabher C, Mangum BD, Hardy ME, Campbell DS, et al. The  
801 Tol2kit: a multisite gateway-based construction kit for Tol2 transposon transgenesis constructs.  
802 Developmental dynamics : an official publication of the American Association of Anatomists.  
803 2007;236(11):3088-99.
- 804 46. Berger J, Currie PD. 503unc, a small and muscle-specific zebrafish promoter. Genesis  
805 (New York, NY : 2000). 2013;51(6):443-7.
- 806 47. Hartley JL, Temple GF, Brasch MA. DNA cloning using in vitro site-specific  
807 recombination. Genome research. 2000;10(11):1788-95.
- 808 48. Cheo DL, Titus SA, Byrd DR, Hartley JL, Temple GF, Brasch MA. Concerted assembly  
809 and cloning of multiple DNA segments using in vitro site-specific recombination: functional  
810 analysis of multi-segment expression clones. Genome research. 2004;14(10b):2111-20.
- 811 49. Einhorn Z, Trapani JG, Liu Q, Nicolson T. Rabconnectin3alpha promotes stable activity  
812 of the H<sup>+</sup> pump on synaptic vesicles in hair cells. The Journal of neuroscience : the official  
813 journal of the Society for Neuroscience. 2012;32(32):11144-56.
- 814 50. Schneider CA, Rasband WS, Eliceiri KW. NIH Image to ImageJ: 25 years of image  
815 analysis. Nature methods. 2012;9(7):671-5.
- 816 51. Tanimoto M, Ota Y, Inoue M, Oda Y. Origin of inner ear hair cells: morphological and  
817 functional differentiation from ciliary cells into hair cells in zebrafish inner ear. The Journal of  
818 neuroscience : the official journal of the Society for Neuroscience. 2011;31(10):3784-94.
- 819 52. Lu Z, DeSmidt AA. Early development of hearing in zebrafish. Journal of the  
820 Association for Research in Otolaryngology : JARO. 2013;14(4):509-21.

821

822

## 823 Fig Legends

824

825 **Fig 1. Zebrafish *tmie<sup>ru1000</sup>* mutants: phenotype and functional rescue by Tmie-GFP.** All  
826 confocal images are of live, anesthetized larvae. (A) Hair cells in the lateral-line neuromasts (7  
827 dpf) and inner ear cristae (5 dpf) from wild type and *tmie<sup>ru1000</sup>* larvae. A transgene (Actin-GFP)  
828 was used to visualize stereocilia bundles. (B) Sample traces from an auditory evoked behavior  
829 response (AEBR) assay, performed on 6 dpf larvae over the course of 3 minutes. Pure tone  
830 stimuli are indicated by asterisks. Peaks represent pixel changes due to larval movements  
831 (magenta indicates positive response). (C) Quantification of AEBR displayed as box-and-  
832 whiskers plot; significance determined by unpaired t-test with Welch's correction. (D) Top-down  
833 view of neuromasts from 4 dpf larvae after brief exposure to a vital dye, FM 1-43. FM 1-43 and  
834 FM4-64 permeate open transduction channels. (E) Lateral view of a neuromast from a 4 dpf  
835 *tmie<sup>ru1000</sup>* larva expressing transgenic Tmie-GFP, after exposure to FM 4-64. (F) Quantification  
836 of FM 4-64 fluorescence/cell in 5 dpf larvae; significance determined by one-way ANOVA. (G)  
837 A cartoon depiction of a group of lateral-line hair cells viewed laterally, with close-up views of a  
838 single cell at the bundle region. The dashed green line indicates the single plane containing the  
839 stereocilia bundles. The magenta bracket indicates the area used to make the maximum  
840 projections that were analyzed for FM fluorescence in (F). (H) Sample traces of extracellular  
841 (microphonic) recordings, evoked from the inner ear of 3 dpf larvae. A piezo actuator was used  
842 to stimulate larvae with a 200 Hz sine-wave mechanical stimulus using an 8 V driver voltage. All  
843 statistics are mean  $\pm$  SD, \*\*\*\*p<0.0001. Scale bars: 10 $\mu$ m.

844

845 **Fig 2. Tmie-GFP is present in the hair bundles of MET mutants.** Confocal images of the  
846 bundle region in hair cells of the inner-ear lateral crista in live larvae. Larvae at 6 dpf expressing  
847 transgenic Tmie-GFP in the genetic backgrounds of wild type (A), and homozygous mutants for  
848 the tip link protein Pcdh15a (B, *pcdh15a<sup>psi7</sup>*), the accessory protein Lhfpl5a (C, *lhfp15a<sup>tm290d</sup>*), and  
849 the Golgi-localized protein Tomt (D, *tomt<sup>tk256c</sup>*). Tomt-deficient fish lack Tmc expression in hair  
850 cell bundles [11], presumably mimicking the condition of a triple Tmc knockout. Arrowheads  
851 indicate splayed hair bundles. n=8 each genotype. Scale bar: 5µm.

852

853 **Fig 3. Specific loss of Tmc1 and Tmc2b in tmieru1000 larvae.** Maximum projections of the  
854 hair bundle region (ROI) of hair cells in the lateral crista of the inner ear, collected from live  
855 larvae using confocal microscopy. (A-B) 6 dpf larvae expressing either transgenic Pcdh15aCD3-  
856 GFP or GFP-Lhfpl5a (n=6 each genotype). (C) 3 dpf larvae expressing Tmc1-GFP. (D) Plot of  
857 the integrated density of Tmc1-GFP fluorescence in the ROI; each data point represents one  
858 crista. Statistical significance determined by two-tailed unpaired t-test with Welch's correction,  
859 p=0.0002. (E) 4 dpf larvae expressing Tmc2b-GFP. The arrow points to the cuticular plate/apical  
860 soma region, just below the ROI. (F) Plot of the integrated density of Tmc2b-GFP fluorescence  
861 in the ROI. Statistical significance determined by two-tailed unpaired t-test with Welch's  
862 correction, p=0.0005. (G) 4 dpf *tmie<sup>ru1000</sup>* larva co-expressing two transgenes, *tmc2b-GFP* and  
863 *tmie-p2A-NLS(mCherry)*. The p2A linker is a self-cleaving peptide that results in equimolar  
864 expression of Tmie and nuclear mCherry. (H) Plot of the integrated density of Tmc2b-GFP  
865 fluorescence/crista in the ROI; significance determined by one-way ANOVA. All statistics are  
866 mean ± SD. Scale bars: 5µm.



867

868 **Fig 4. Schema for a systematic domain analysis of Tmie and subcellular localization of**

869 **Tmie constructs.** (A) A linear diagram of 12 unique constructs of tmie used in our experiments.

870 Full-length Tmie is predicted to contain two hydrophobic helices or transmembrane domains

871 (1TM and 2TM). SP44-231 and SP63-231 replace part of the N-terminus with a signal peptide

872 (SP) from the Glutamate receptor 2a (in blue). In the CD8, CD8-2TM, and 2TM-CD8 constructs,

873 all or part of the 2TM is replaced by the helix from the CD8 glycoprotein (in yellow). Tmie-short

874 is a fish-specific isoform of Tmie that contains an alternate final exon (in orange). Dotted lines

875 represent internal deletions. (B) Representative confocal images of each construct being

876 expressed as a GFP-tagged transgene in hair cells of 4-6 dpf *tmie<sup>ru1000</sup>* larvae. Expression is

877 mosaic due to random genomic insertion into subsets of progenitor cells after single-cell

878 injection. The expression of the CD8 construct is shown in a neuromast, while all others are in

879 the inner ear middle crista. (C) The localization of each GFP fusion protein was determined by

880 measuring the fluorescence/area in the bundle (b) and soma (s), and then calculating  $b/(b+s)$ . (D)

881 Enrichment in the hair bundle is displayed as a ratio for each construct, with 1 being completely

882 bundle-enriched and 0 being completely soma-enriched. Scale bar in (B): 5 $\mu$ m.

883

884 **Fig 5. The second transmembrane and adjacent residues of Tmie are required for rescue of**

885 **FM labeling.** All images are a top-down view of a representative neuromast from 6 dpf larvae

886 collected using confocal microscopy. The left image is a single plane through the stereocilia

887 (green dashed line in Fig 1G) with DIC + GFP fluorescence. The right image is a maximum

888 projection of the soma region (magenta bracket in Fig 1G) showing FM 4-64 fluorescence. (A)

889 Representative images of neuromasts in *tmie<sup>ru1000</sup>* larvae, each stably expressing an individual

890 *tmie* construct. FM fluorescence was normalized to wild type non-transgenic larvae generated  
891 with the *Tmie*-GFP line. (B) Box-and-whiskers plot of the integrated density of FM  
892 fluorescence/cell in transgenic *tmie<sup>ru1000</sup>* compared to non-transgenic wild type and mutant  
893 siblings for each construct. (C) Representative images of neuromasts in wild type larvae with or  
894 without transgene. FM fluorescence was normalized to wild type non-transgenic larvae of the  
895 *Tmie*-GFP line. (D) Box-and-whiskers plot of the integrated density of FM fluorescence/cell in  
896 wild type neuromasts with and without transgene. Significance determined within each clutch by  
897 one-way ANOVA,  $n \geq 9$ , \*\* $p < 0.01$ , \*\*\* $p < 0.001$ , \*\*\*\* $p < 0.0001$ . Scale bars in (A) and (C) are  
898  $10 \mu\text{m}$ .

899

900 **Fig 6. The second transmembrane and adjacent regions of *Tmie* are required for inner ear**

901 **microphonics.** (A) A DIC image of a 3 dpf larva anesthetized and pinned (glass fiber) for inner

902 ear recordings. Shown are a probe attached to a piezo actuator (piezo) pressed against the head

903 and a recording pipette pierced into the inner ear. (B) Traces from a wild type larva. A step

904 stimulus for 20ms was applied; 200 traces were averaged for each of the six piezo driver

905 voltages: 2V, 3V, 4V, 5V, 6V, and 10V. Gray box: magnification of the onset of response in

906 individual traces. (C-I) Same protocol as in (B). Mean amplitude of the response peak  $\pm$  SD as a

907 function of the stimulus intensity of the driver voltage. Statistical significance determined by

908 two-way ANOVA comparing all groups to wild type non-transgenic siblings,  $n \geq 5$ , \* $p < 0.05$ ,

909 \*\* $p < 0.01$ , \*\*\* $p < 0.001$ , \*\*\*\* $p < 0.0001$ . Scale bar:  $100 \mu\text{m}$ .

910

911 **Fig 7. Effect of transgenic *Tmie* constructs on *Tmc2b*-GFP bundle localization.** Confocal

912 images are maximum projections of representative inner-ear lateral cristae collected from 4 dpf

913 larvae. Upper panels show the bundle region, with all larvae stably expressing transgenic  
914 Tmc2b-GFP (green). Lower panels show the soma region, with some larvae expressing  
915 transgenic Tmie constructs tagged with p2A-NLS(mCherry). Nuclear mCherry (magenta) is a  
916 marker for equimolar translation of the indicated Tmie construct. (A) Sibling wild type,  
917 *tmie<sup>ru1000</sup>*, and *tmie<sup>ru1000</sup>* expressing full-length Tmie. For the quantification in (G), Tmc2b-GFP  
918 fluorescence was measured within the ROI (right panel, black line). (B-G) *tmie<sup>ru1000</sup>* larvae  
919 expressing individual Tmie constructs tagged with p2A-NLS(mCherry), as labeled. The arrows  
920 in (D) point to Tmc2b-GFP in immature hair bundles. (H) Plot of the integrated density of  
921 Tmc2b-GFP fluorescence in the ROI, comparing *tmie<sup>ru1000</sup>* larvae expressing a tmie construct  
922 (magenta) to wild type (black) and *tmie<sup>ru1000</sup>* (gray) siblings not expressing tmie construct.  
923 Significance for SP44-231 and SP63-231 was determined by the Kruskal-Wallis test, for all other  
924 tmie constructs by one-way ANOVA,  $n \geq 6$ , \*\*\* $p < 0.001$ , \*\*\*\* $p < 0.0001$ . Scale bars: 10  $\mu\text{m}$ .  
925

926 **Fig 8. Summary of experimental results for tmie constructs and model of discrete**  
927 **functional domains of Tmie.** (A) Symbols as follows: enhanced above wild type (++),  
928 comparable to wild type (+), partially reduced (+/-), and severely reduced or absent (-). For  
929 *dominant negative effect*, the effect is present (+) or absent (-). Blank spaces are not determined.  
930 Refer to Fig 4A for details on constructs. (B) A model of the protein sequence of zebrafish Tmie.  
931 Amino acids 1-43 are separated due to suspected cleavage as a signal peptide. Although shown  
932 as a TM domain, it is unclear whether the first hydrophobic region forms a helix. Note that the  
933 extracellular region (yellow glow) was never deleted in its entirety; SP63-231 deleted  
934 QIPDPELLPTDPPKKPDPV, and  $\Delta$ 63-73 deleted TSETVVFWGLR. Also note that the TM  
935 domain with orange lettering only had an effect on the stability of Tmie when the entire helix  
936 was substituted.

937

## 938 **Supporting information**

939

940 **S1 Fig. Tmie-GFP shows variable expression in stereocilia.** Representative images of the  
941 lateral crista in a wild type larva at 6 dpf, generated using confocal microscopy. (A) The hair  
942 bundle region of hair cells expressing transgenic tmie-GFP driven by the myo6b promoter. The  
943 arrow and bracket show, respectively, the short kinocilium and stereocilia bundle of an immature  
944 hair cell. (B) A single hair bundle with “bundle fill” expression pattern produced by  
945 overexpression of Tmie-GFP. (C) A single bundle with Tmie-GFP concentrated along the  
946 beveled edge of the stereocilial staircase. (D) A single bundle with punctate expression of Tmie-  
947 GFP suggestive of localization at the site of MET. Scale bar in (A): 5 $\mu$ m, in (D): 2 $\mu$ m.

948

949 **S2 Fig. Differential effects on function with a genomic mutation and a transgene mimic.** (A)  
950 Data for a novel mutant allele of *tmie*, *t26171*. DNA: Chromatographs of the DNA sequence of  
951 *tmie* in wild type (above) and *tmie*<sup>*t26171*</sup> (below) showing the genomic region where the mutation  
952 occurs. An arginine is mutated to guanine in the splice acceptor (black box, above) of the final  
953 exon of *tmie*, exon 4. The dashed black box below indicates the mutated original splice acceptor  
954 site. Use of a cryptic splice acceptor (black box, below) 8 nucleotides downstream causes a  
955 frameshift and an early stop codon (\*). cDNA: Chromatograph of the DNA sequence from RT-  
956 PCR of *tmie*<sup>*t26171*</sup> larvae bridging exons 3 and 4. Protein: The predicted protein products, shown  
957 here as a two-pass transmembrane protein. The wild type protein has many charged residues  
958 (positive in light gray, negative in dark gray) that are lost in *tmie*<sup>*t26171*</sup>. Balance: Photos of wild  
959 type and *tmie*<sup>*t26171*</sup> larvae, taken with a hand-held Canon camera. Arrow points to a larva that is  
960 upside-down, displaying a classic vestibular phenotype. (B) Top-down view of a representative  
961 neuromast after exposure to FM 4-64, imaged using confocal microscopy. The first panel is a  
962 single plane through the soma region while the second panel is a maximum projection of 7  
963 panels through the soma region, beginning at the cuticular plate (as denoted by magenta bracket  
964 in Fig 1G). (C) Same as (B) except that the first panel shows the bundle region so that 1-138-  
965 GFP can be visualized in bundles (as depicted by dashed green line, Fig 1G). The transgene is  
966 driven by the *myo6b* promoter. (D) Plot of the integrated density of FM fluorescence per cell as a  
967 percent of wild type siblings. Displayed wild type and *tmie*<sup>*ru1000*</sup> data are from siblings of *Tg(1-*  
968 *138-GFP)*; *tmie*<sup>*ru1000*</sup>, while *tmie*<sup>*t26171*</sup> data are from a separate experiment. Statistical significance  
969 determined by one-way ANOVA, \*\*\*\*p<0.0001. Scale bar: 10µm.  
970

971 **S3 Fig. Functional rescue of *tmieru1000* by constructs SP63-231 and 2TM-CD8 is Tmc**  
972 **dose-dependent.** (A) Mean amplitude of the response peak  $\pm$  SD as a function of the stimulus  
973 intensity of the driver voltage, as described in Fig 6B. (B) XY plot of the amplitude of  
974 microphonic response vs the integrated density of Tmc2b-GFP fluorescence in the ROI. A 10V  
975 step stimulus was used to evoke microphonic potentials. The line is a linear regression,  $R^2=$   
976 0.5216. (C) Same as (A) for the 2TM-CD8 construct. (D) Same as (B) for the 2TM-CD8  
977 construct,  $R^2= 0.7726$ . Measurements are from 4 dpf larvae.

978

979 **S4 Fig. In  $\Delta 63-73$ , Tmc2b-GFP traffics to bundles but does not maintain high expression in**  
980 **mature cells.** Confocal images of single hair bundles from cells expressing transgenic Tmc2b-  
981 GFP driven by the *myo6b* promoter. Brackets show the stereocilia bundle, which is shorter in  
982 immature hair cells (white brackets) and longer in mature ones (black brackets). Larvae are 4  
983 dpf. Scale bar: 2 $\mu$ m.

Morphology

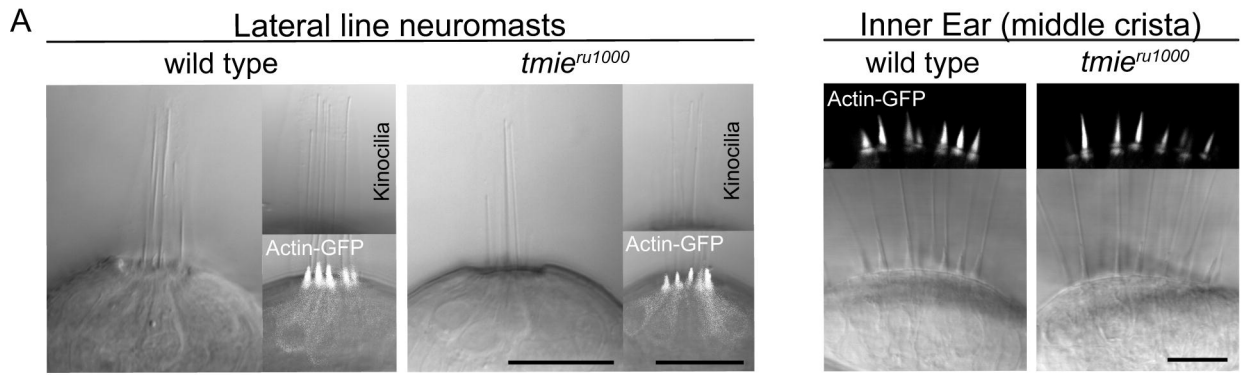

Deafness

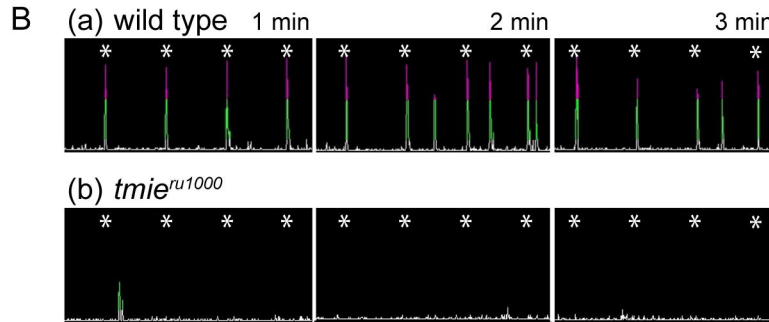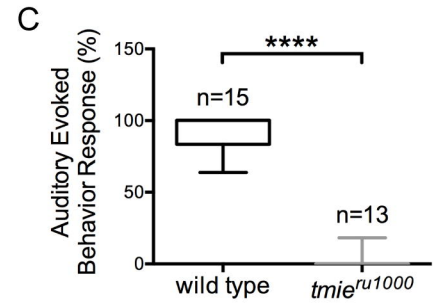

Transduction defect

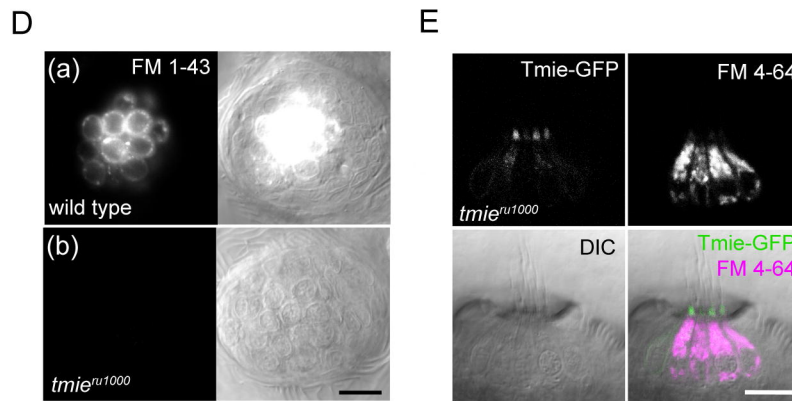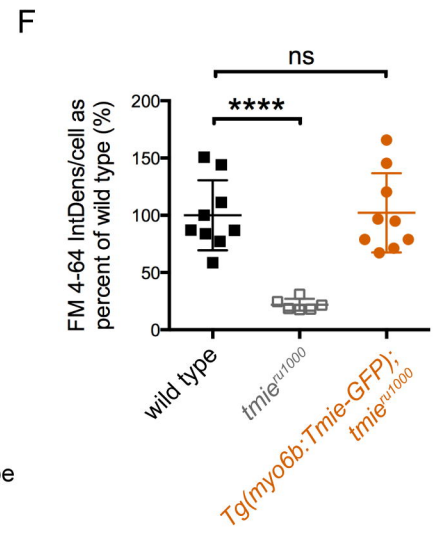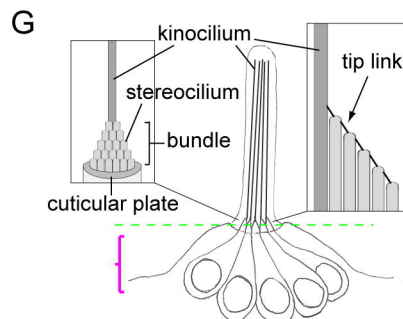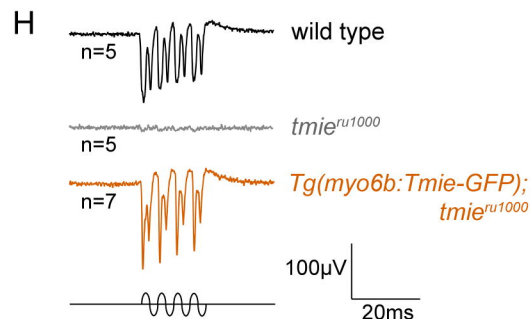

*Tg(myo6b:Tmie-GFP)*

A

wild type

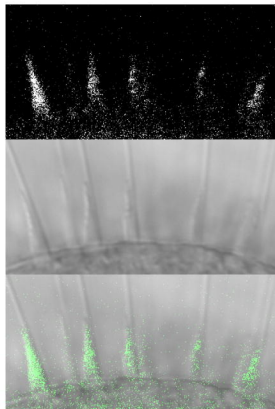

B

*pcdh15a<sup>psi7</sup>*

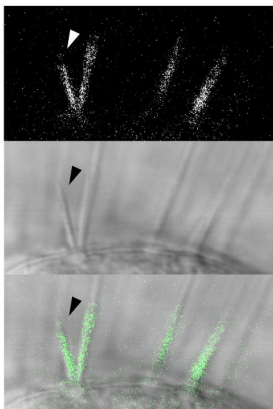

C

*lhfp15a<sup>tm290d</sup>*

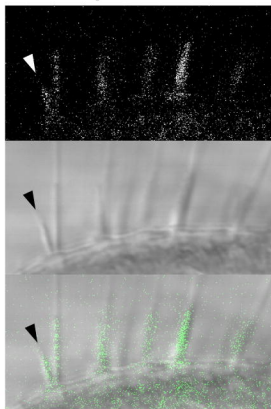

D

*tomt<sup>tk256c</sup>*

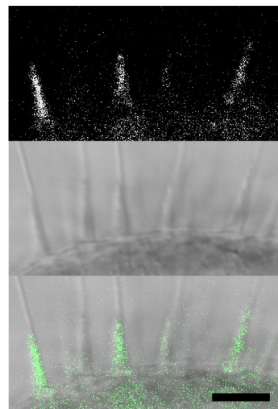



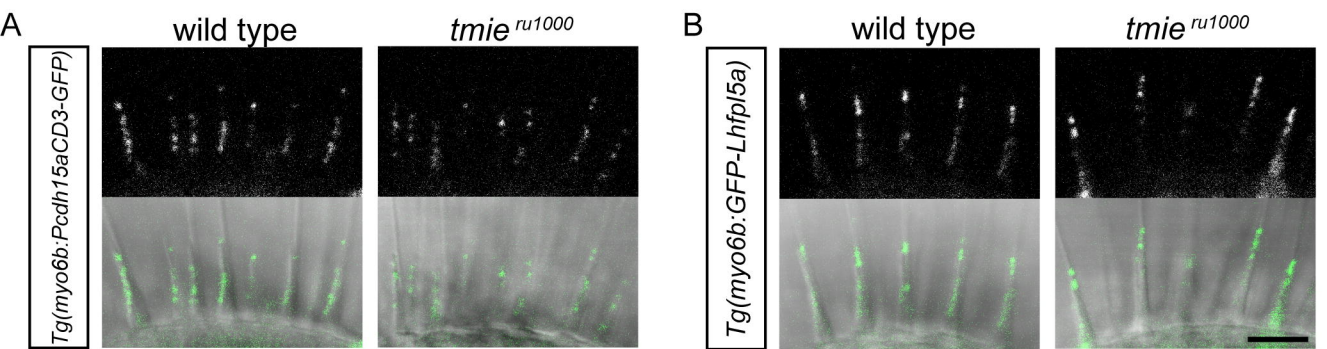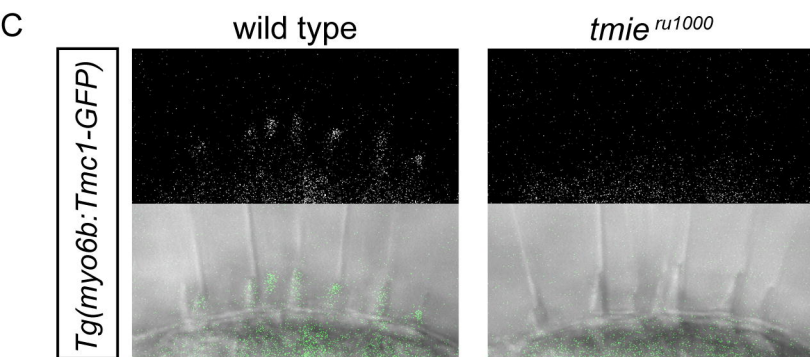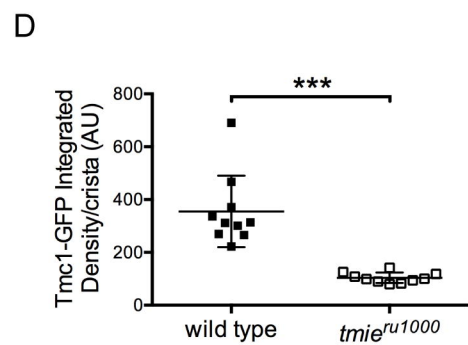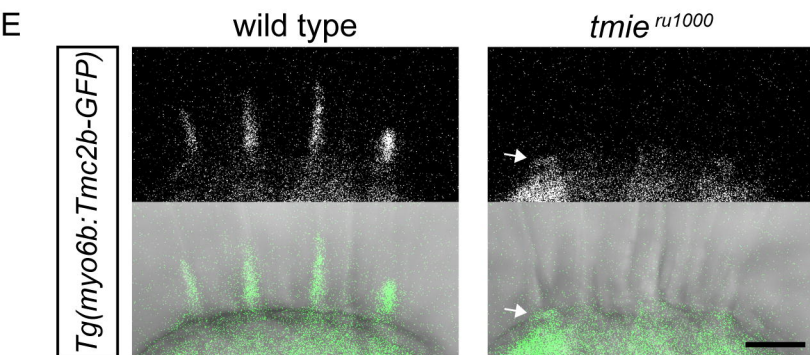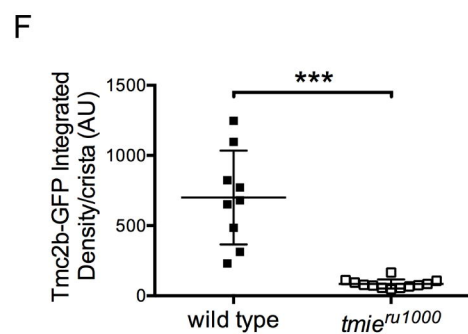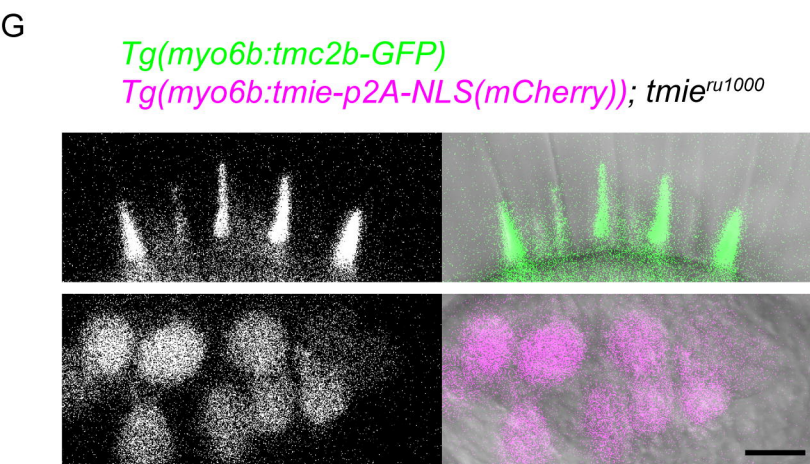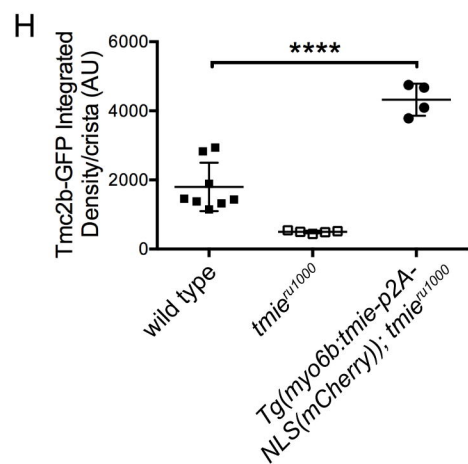

A

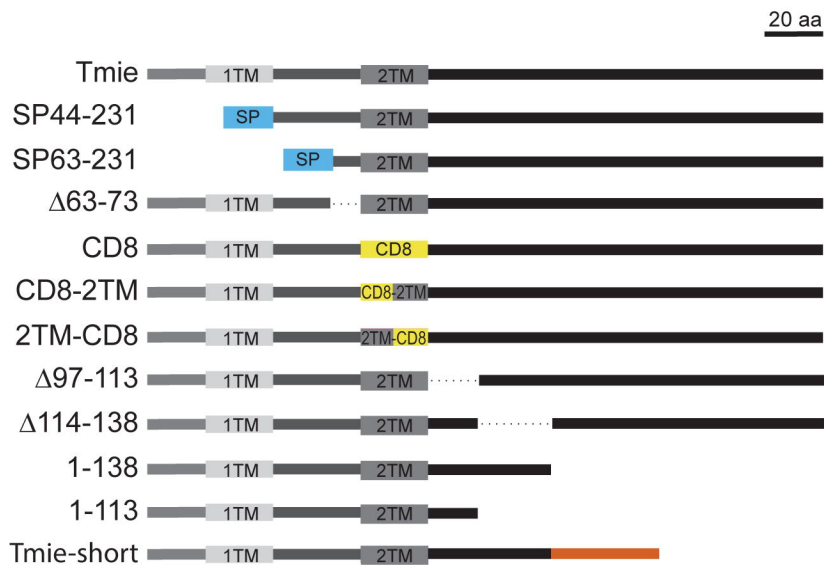

B

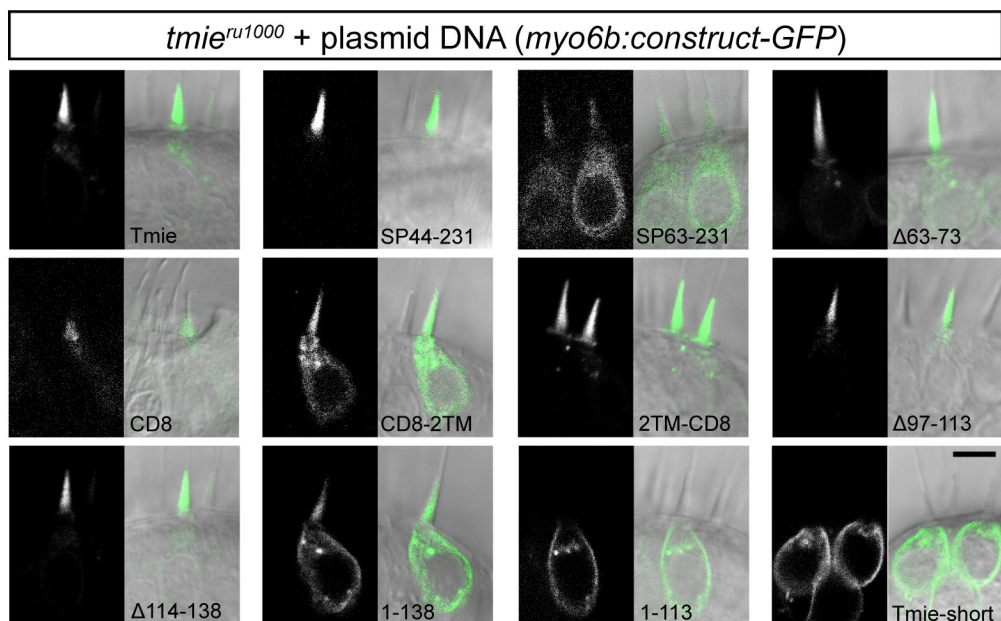

C

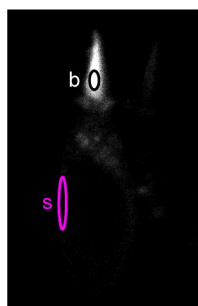

D

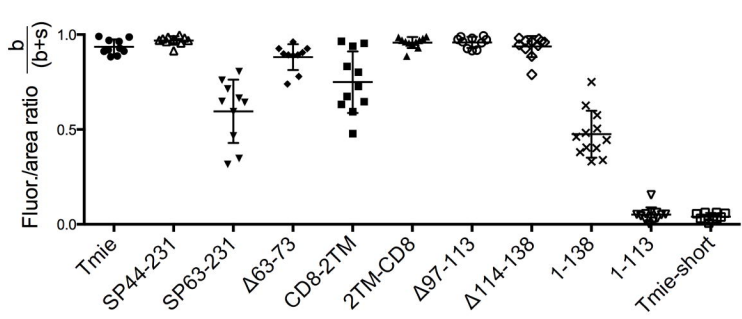

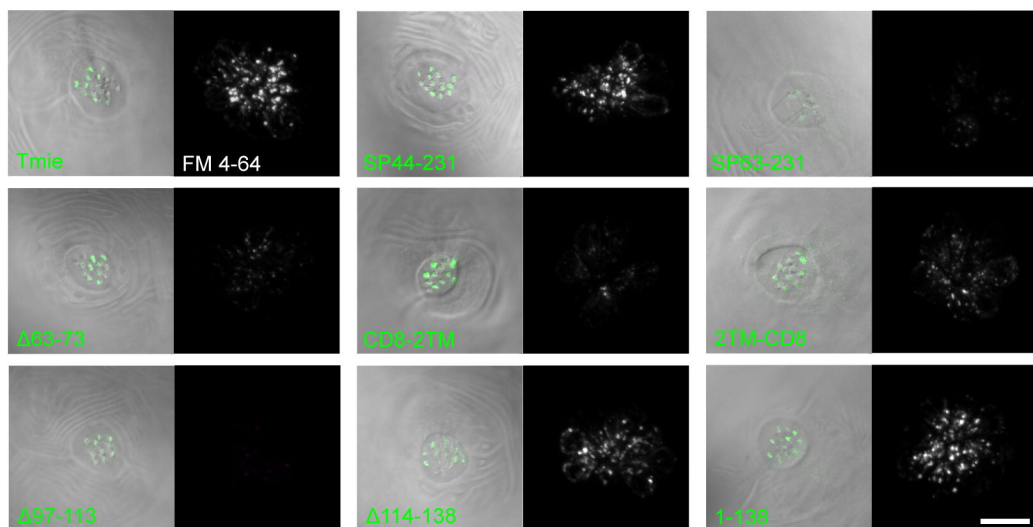

B

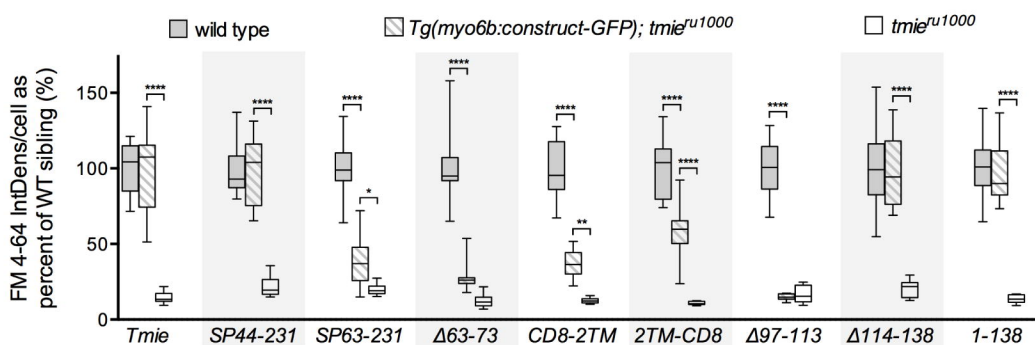

C

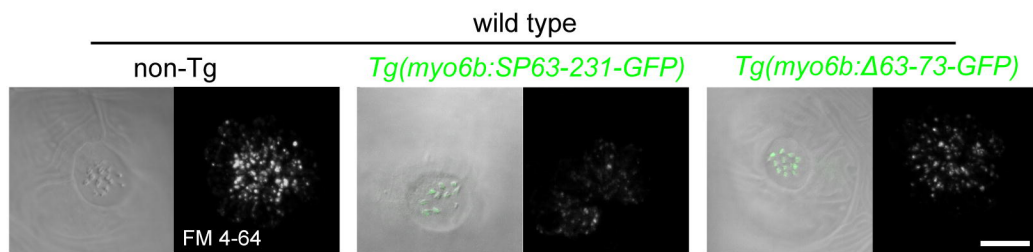

D

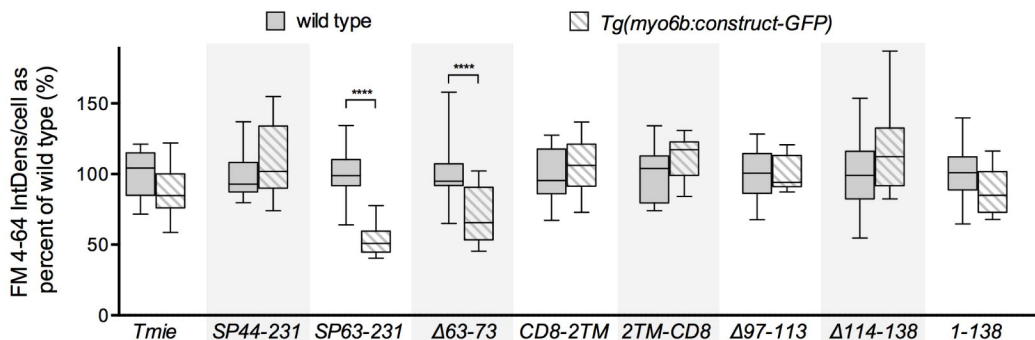

—■— wild type  
—■— *tmie<sup>ru1000</sup>*

—●— *Tg(myo6b:construct-GFP)*

—●— *Tg(myo6b:construct-GFP); tmie<sup>ru1000</sup>*

A

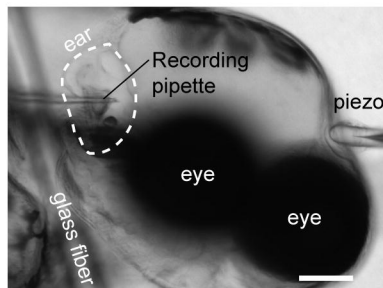

B

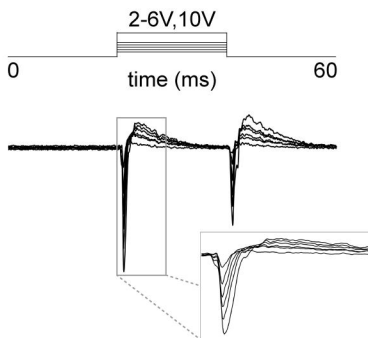

C

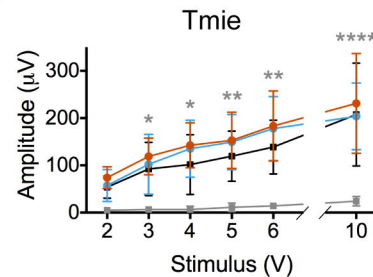

D

SP44-231

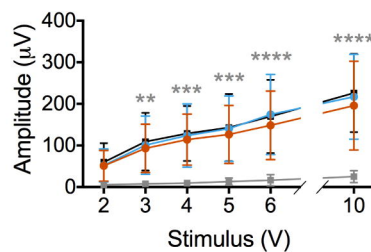

E

SP63-231

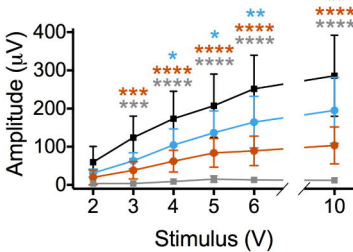

F

Δ63-73

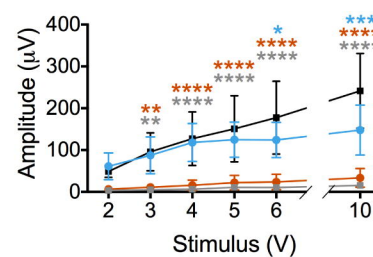

G

CD8-2TM

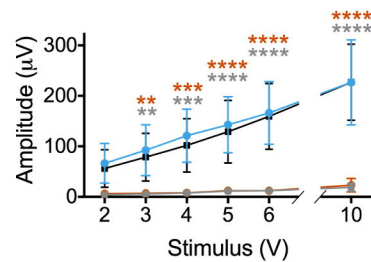

H

2TM-CD8

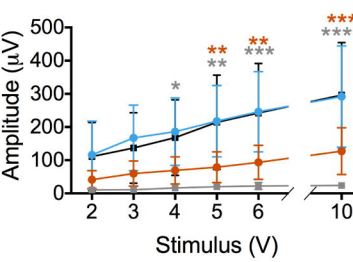

I

Δ97-113

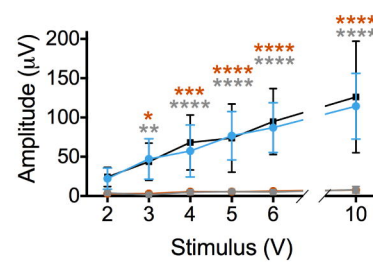

*Tg(myo6b:tmc2b-GFP)*

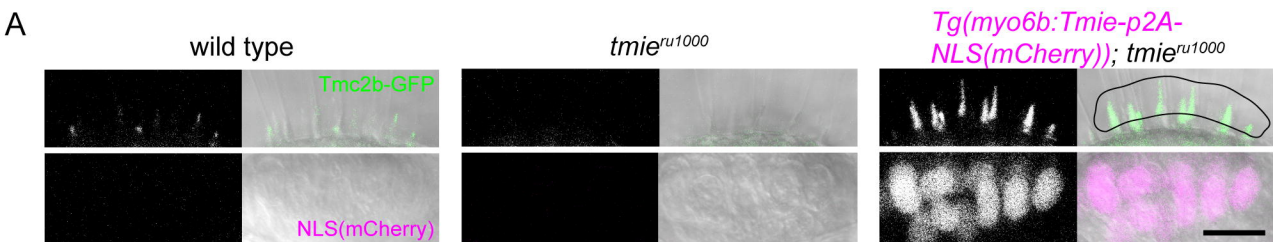

*Tg(myo6b:tmc2b-GFP) Tg(myo6b:construct-p2A-NLS(mCherry)); tmie<sup>ru1000</sup>*

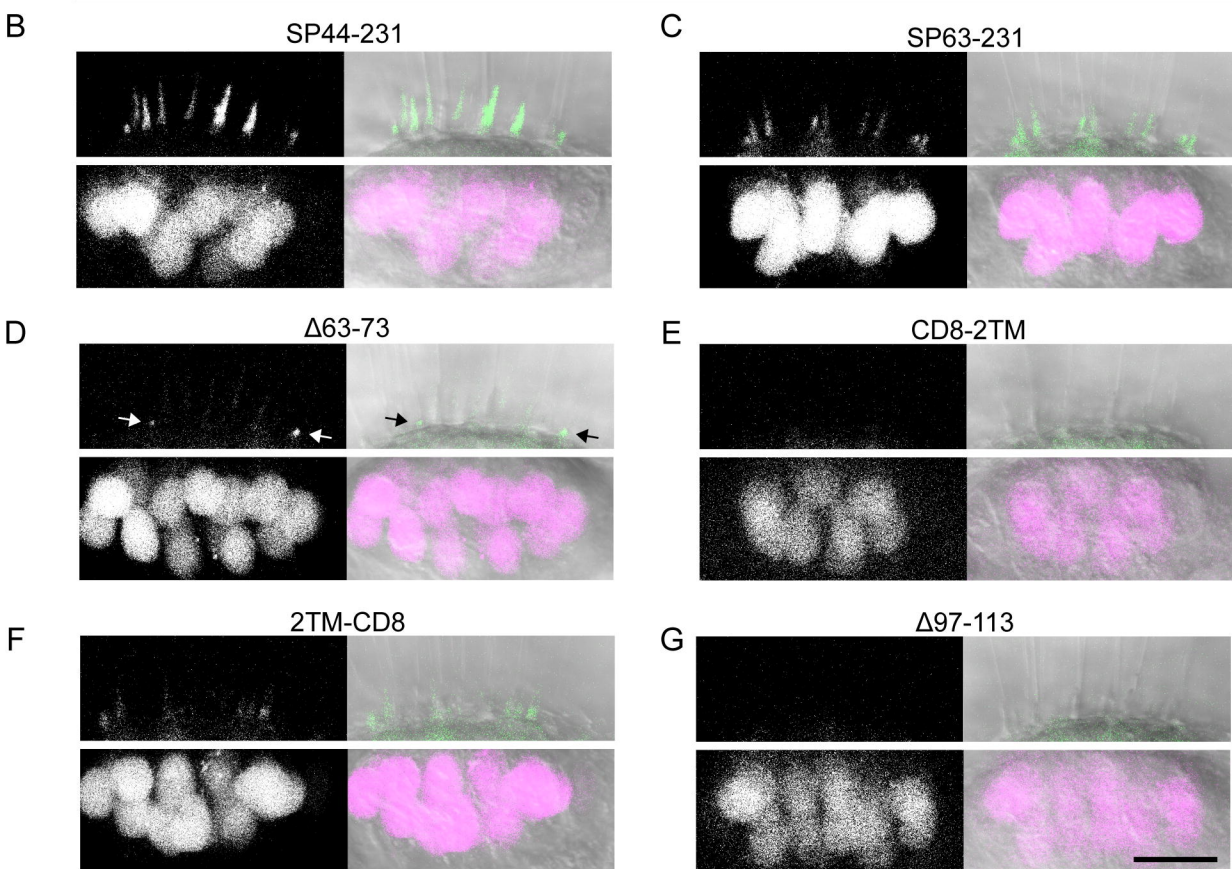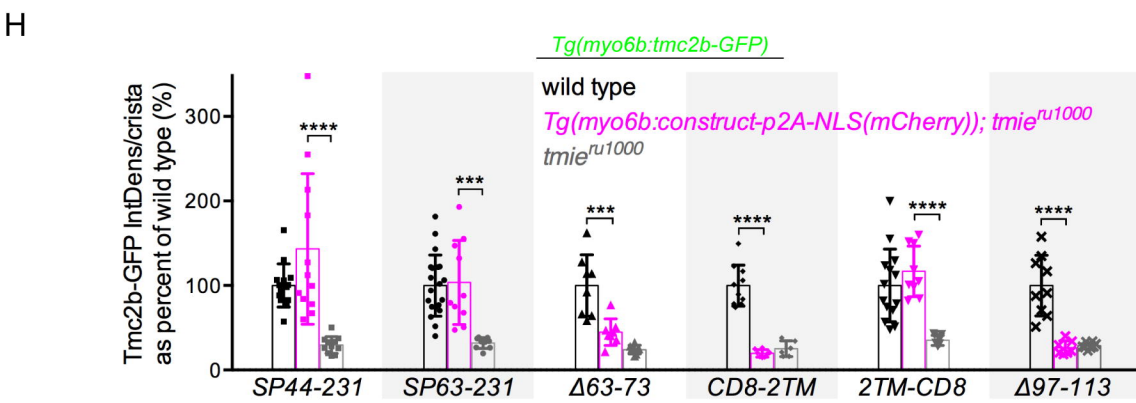

A

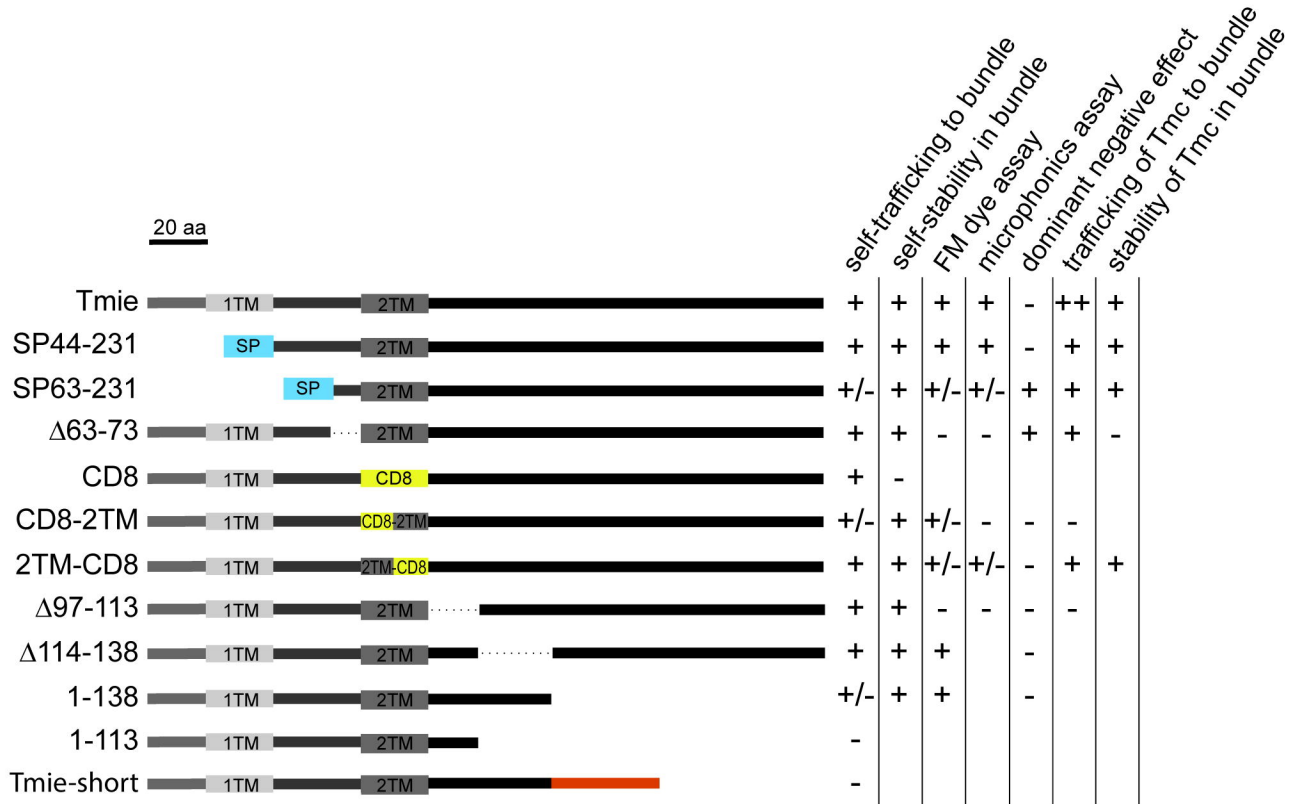

B

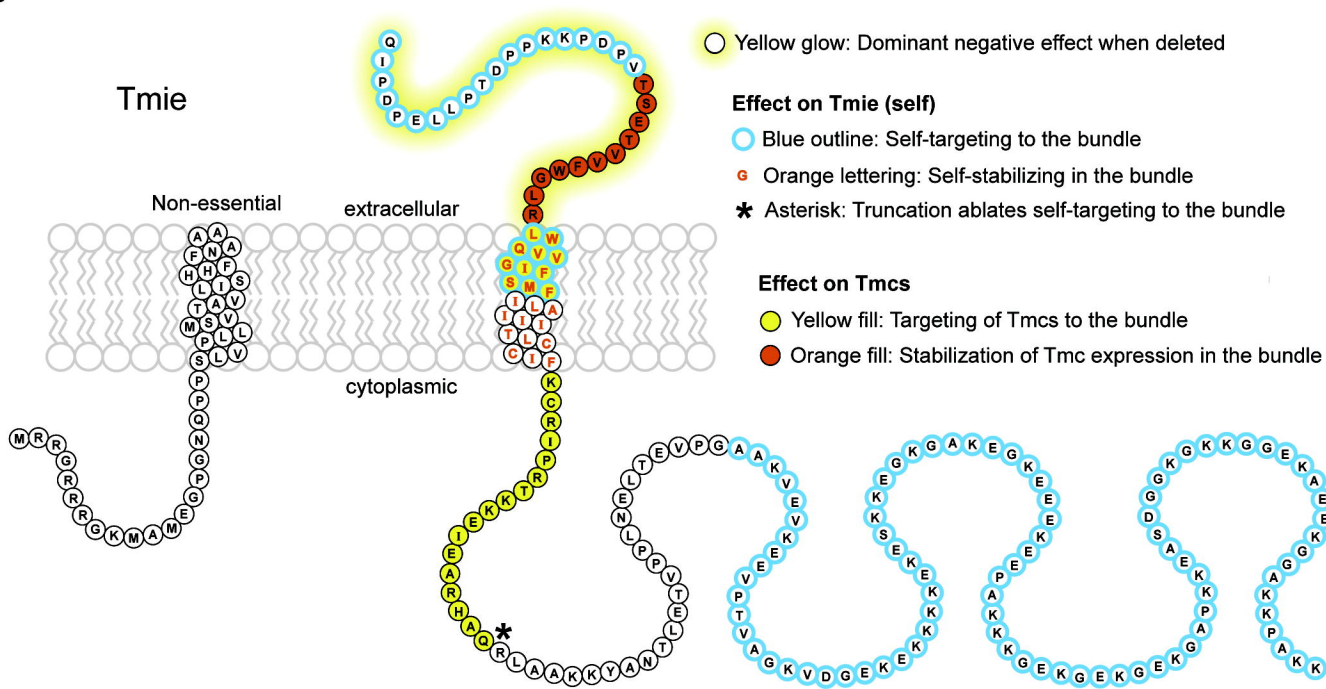

Source: https://www.biorxiv.org/content/10.1101/393330.full.pdf
